# Supplementary material for: Hypoglycemic effect of Lactobacillus plantarum-fermented mulberry pomace extract in vitro and in Caenorhabditis elegans
Source: Royal Society of Chemistry journal article supplement (doi:10.1039/d3fo02386a), 2023-01-01
Supplement: d3fo02386a1.pdf [file d3fo02386a1.pdf]

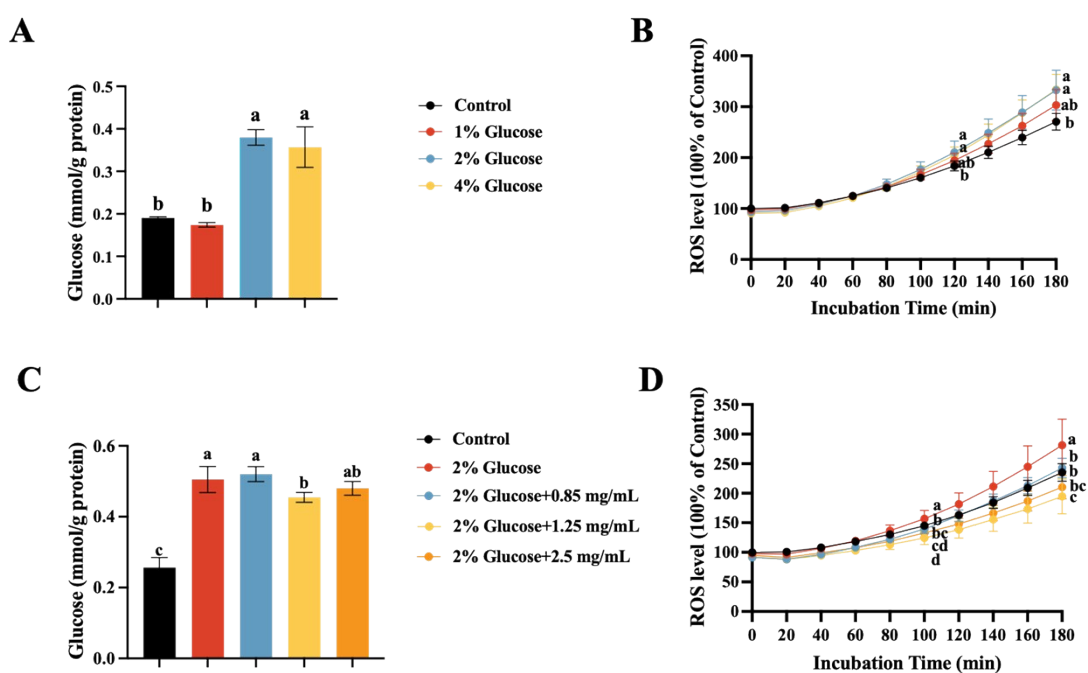

**Fig. S1.** The glucose content (A) and ROS level (B) in high glucose model. The effect of different sample concentrations on glucose content (C) and ROS level (D). Data expressed as mean  $\pm$  standard deviation (A and C,  $n = 3$ ; B and D,  $n = 6$ ). Means with different letters in figure were significantly different at  $p < 0.05$ .

**Table S1.** Purity of polyphenol extracts at different fermentation time.

| Polyphenol extracts | Purity (%)                  |
|---------------------|-----------------------------|
| NF                  | 47.06 ± 0.51 <sup>ab</sup>  |
| F0                  | 43.67 ± 1.39 <sup>c</sup>   |
| F1                  | 46.73 ± 1.86 <sup>ab</sup>  |
| F2                  | 46.23 ± 1.67 <sup>abc</sup> |
| F3                  | 44.22 ± 1.50 <sup>bc</sup>  |
| F5                  | 46.84 ± 1.42 <sup>ab</sup>  |
| F7                  | 44.78 ± 1.74 <sup>bc</sup>  |
| F9                  | 47.95 ± 1.81 <sup>a</sup>   |

The purity of polyphenol extract was expressed as the ratio between the total polyphenol content and the total quality of the extract, expressed as a percentage. NF, non-fermented; F0/F1/F2/F3/F5/F7/F9, fermentation for 0/1/2/3/5/7/9 d. Data expressed as mean ± standard deviation (n = 3). Means with different letters were significantly different at  $p < 0.05$ .

**Table S2.** Primers of genes used for qPCR.

| Gene          | Forward primer             | Reverse primer         |
|---------------|----------------------------|------------------------|
| <i>act-1</i>  | CCAGGAATTGCTGATCGTATGCAGAA | TGGAGAGGGAAGCGAGGATAGA |
| <i>sod-3</i>  | AGCATCATGCCACCTACGTGA      | CACCACCATTGAATTTTCAGCG |
| <i>ctl-1</i>  | GAATGTGAAGAATTATTTTCGCTGA  | AACTCGATTCTGGGACGAT    |
| <i>daf-16</i> | TCGTGTGCTCAGAATCCACT       | TGCAGCTACAATTCCACACG   |
| <i>skn-1</i>  | CTTCAGGACGTCAACAGCAG       | GATTCCGAAGAGAGGCGAGA   |
| <i>gst-4</i>  | TCTTGCTGAGCCAATCCGTA       | AATGGGAAGCTGGCCAAATG   |
| <i>gcs-1</i>  | GTCGATGAAGCCAGATGGTTGT     | CGATCGTCGACACTTGCACTAA |
| <i>mtl-1</i>  | AGTGCGGAGACAAATGTGAATGC    | AGCAGTTCCTGGTGTGATGG   |
