# Supplementary material for: Hypoglycemic effect of Lactobacillus plantarum-fermented mulberry pomace extract in vitro and in Caenorhabditis elegans
Source: Royal Society of Chemistry journal article supplement (doi:10.1039/d3fo02386a), 2023-01-01
Supplement: d3fo02386a2.xlsx [file d3fo02386a2.xlsx]

## Sheet: Fig.1,Table1
	Standards(0.04 mM)
		positive
		MS	Formula	Identification	MA
		449.108	C21H20O11	cyanidin-3-O-glucoside	53707.5
		303.05	C15H10O7	delphindin	26889.9
		negative
		MS	Formula	Identification	MA
		153.019	C7H6O4	protocatechuic acid	15834.4
		167.034	C8H8O4	isovanillic acid	3029.1
		609.146	C27H30O16	rutin	412397
		463.088	C21H20O12	quercetin-3-O-glucoside	325734
		303.051	C15H12O7	taxifolin	96379.3
		447.093	C21H20O11	quercitrin/quercetin-3-O-rhamnoside	302211
		301.035	C15H10O7	morin	98834.1
		301.035	C15H10O7	quercetin	188974
		285.04	C5H10O6	kaempferol	337566
				Samples	NF			F0			F1			F2			F3			F5			F7			F9
				Identification	MA1	MA2	MA3	MA1	MA2	MA3	MA1	MA2	MA3	MA1	MA2	MA3	MA1	MA2	MA3	MA1	MA2	MA3	MA1	MA2	MA3	MA1	MA2	MA3
				protocatechuic acid	553.962	533.991	573.934	542.9	490.7	536.9	7636	7925.1	8131.1	9442.7	9834.7	9540.8	12777.3	13156.1	13214.9	21467.1	21675.1	22022.1	19082.4	20237	19926.3	20634.2	20923.2	20187.1
				taxifolin-3-O-glucoside	250215	254183	256333	218045	202368	209212	183313	185030	182179	215594	217061	216370	171297	173939	173561	139454	140089	141295	95115.4	94599.7	94251.6	87952.6	88887.3	88754.2
				2, 4, 6-trihydroxybenzaldehyde	544.6	610.4	557.2	560.1	565.3	518.1	24162.2	23826.7	24388.5	29937	29700.8	30199.5	42344.8	41985.1	42788.3	66723.3	67835.5	66579.2	63795.3	64190.5	62352.7	59291.8	60162.9	60605.9
				taxifolin	88.8	105.4	107.8	102	101.7	107.8	20394.6	19757.3	20155	30781.8	30608.9	30873	38298.1	39117.9	37257.5	99370.7	100945	98261	95214.9	95953.4	93619.9	81970.9	80923.1	81589.6
				isovanillic acid	0	0	0	0	0	0	1029.8	1047.5	1074.7	1439	1471.9	1426.5	1707.9	1756.1	1858.5	1590	1624.6	1621.8	2077.6	2072.8	2084.2	1573.5	1644.7	1659.8
				rutin	86195.4	85304.7	86119.3	74729.2	72717.6	75145.3	66409	65530	63315.6	56245.8	55156.3	55553.8	40462.9	41335.9	41817	27421.4	27904.3	28295.5	15029.2	15166.8	15337.1	14834.7	14858	14769.8
				quercetin-3-O-glucoside	19330.4	19224.4	20103.2	15560.5	14201.1	15866	31054.8	29696.3	30809.2	32643.2	32967	32305.7	19850.8	20115.5	20155.8	15656.3	15729.9	15877.5	9277.6	9202.1	9493.7	15406.9	15489.9	15271.6
				taxifolin-3-O-rutinoside	5643.3	5011.3	5444.8	4767.1	4675.5	4767.1	3522.5	3608	3559.7	2391.4	2443.5	2297.2	1704.3	1731	1649.7	894.9	925	995.5	362.3	386.1	362.3	420.7	470.2	430
				quercetin-3-O-rhamnoside	1231.5	1334.4	1208.2	1071.1	1038.4	1042.7	2708.6	2755.1	2658.5	1358.7	1254	1348.2	457.4	339.2	421.7	315.1	419.9	351.6	86.3	100.4	94	267.8	238.9	292.2
				morin	1951.2	1789.3	1942.9	1169.8	1210.1	1299.5	433.8	512.9	598.1	1022.8	876.5	1085.4	1318.9	1218.2	1228.1	1041	1067.6	984.2	581.4	601.8	649.1	443.9	472.3	421.2
				quercetin	15744.7	15870.2	15920.2	14038.3	13578.4	13773.6	34985.7	35382.2	35859.9	48800.1	49729.3	49184.9	49392.5	51028.6	50479.8	77098.5	76183.4	74720.2	78433.8	77634.2	77007.2	82274.2	81719.9	81492.2
				kaempferol	869.9	976.6	865.5	1041.9	1049.8	1043.8	2900.2	3015.4	2978.1	5891.7	6020.3	5891.7	6393.8	6505.1	6543.5	9447.2	9617.6	9451.3	9186.3	9330.9	9216.8	9460.7	9664.1	9508.9
				cyanidin-3-glucoside	244268	251012	254078	208694	204512	208459	182441	178047	179960	210943	207582	204798	175397	175924	176589	143661	144799	145274	100648	99778.3	101517	97778.5	96175.4	98326.1
				cyanidin-3-rutinoside	306074	313970	315032	257228	254148	259516	292187	283170	279795	292089	295341	291443	272965	272074	269077	271738	273491	274902	200582	198403	199854	184104	185024	183324
				pelargonidin-3-O-glucoside	11365.4	10959.4	11305.4	8896.6	9013	9025.9	6583.9	6358.6	6319.9	6229.6	6285.2	6678.1	4074.2	4058.9	4040.6	2067	2067	2067	966	1073	960.8	1031	1101.2	1112.2
				pelargonidin-3-O-rutinoside	7086.6	7577.4	7463.8	5713.4	5713.4	5713.4	7517	7613.9	7517	7438.3	7575.4	7665.3	6114.8	5839.4	6114.8	4857.4	4857.4	4857.4	2944.9	2841.2	2827.3	2650.5	2449.9	2646.1
				cyanidin	0	0	0	0	0	0	2567.6	2635	2704.1	7314.9	7270.7	7138	6668.8	6662.7	7144.8	27487.3	27124.3	27067.5	16624.8	17062.4	15467.5	15635.7	14995.6	15507.2
				delphindin-3-O-glucoside	3259.4	3183.5	3186.9	2766.9	2781.1	2592.6	2393.8	2421.2	2443.4	1910.2	1775.5	1749.3	1040.3	1067	1065	792.6	812.1	800.1	249.4	188.4	202.7	190	220	225.7
				𝜇g/mL	NF			F0			F1			F2			F3			F5			F7			F9
		MAStandards	Mw	Identification	content1	content2	content3	content1	content2	content3	content1	content2	content3	content1	content2	content3	content1	content2	content3	content1	content2	content3	content1	content2	content3	content1	content2	content3
		15834.4	154.11	protocatechuic acid	2.1566	2.07885	2.23435	2.11353	1.91032	2.09017	29.7273	30.8528	31.6547	36.7608	38.2869	37.1427	49.7426	51.2173	51.4462	83.5723	84.3821	85.733	74.2886	78.7835	77.5739	80.3298	81.4549	78.5892
		96379.3	466.38	taxifolin-3-O-glucoside	484.317	491.998	496.159	422.048	391.704	404.95	354.822	358.145	352.625	417.305	420.144	418.806	331.563	336.677	335.945	269.927	271.157	273.491	184.106	183.107	182.434	170.241	172.05	171.793
		15834.4	154.11	2，4，6-trihydroxybenzaldehyde	2.12015	2.37631	2.1692	2.18049	2.20074	2.01699	94.0645	92.7584	94.9455	116.546	115.626	117.568	164.85	163.45	166.577	259.757	264.087	259.196	248.358	249.896	242.742	230.826	234.217	235.941
		96379.3	304.252	taxifolin	0.11213	0.133091	0.136122	0.128798	0.128419	0.136122	25.7528	24.9481	25.4502	38.869	38.6506	38.9841	48.36	49.3952	47.046	125.478	127.466	124.077	120.23	121.163	118.216	103.507	102.184	103.025
		3029.1	168.149	isovanillic acid	0	0	0	0	0	0	22.8662	23.2592	23.8632	31.9523	32.6828	31.6747	37.923	38.9933	41.267	35.3051	36.0734	36.0112	46.132	46.0255	46.2786	34.9388	36.5197	36.855
		412397	610.518	rutin	51.042	50.5145	50.9969	44.2521	43.0609	44.4985	39.3251	38.8046	37.4933	33.3068	32.6617	32.897	23.9607	24.4777	24.7626	16.238	16.524	16.7556	8.89978	8.98126	9.0821	8.7846	8.7984	8.74617
		325734	464.37	quercetin-3-O-glucoside	11.023	10.9626	11.4637	8.87328	8.09809	9.04749	17.7088	16.9341	17.5688	18.6146	18.7992	18.4221	11.3198	11.4707	11.4937	8.92791	8.96988	9.05405	5.29049	5.24744	5.41372	8.78569	8.83302	8.70854
		96379.3	594.518	taxifolin-3-O-rutinoside	13.9243	12.3649	13.4346	11.7624	11.5364	11.7624	8.69145	8.90241	8.78324	5.90056	6.02912	5.66813	4.20521	4.27109	4.07049	2.20809	2.28235	2.45631	0.893943	0.952667	0.893943	1.03804	1.16018	1.06099
		302211	448.37	quercetin-3-O-rhamnoside	0.730838	0.791904	0.71701	0.635648	0.616242	0.618794	1.60743	1.63502	1.5777	0.806325	0.74419	0.800093	0.271445	0.201299	0.250259	0.186997	0.249191	0.208658	0.051215	0.0595827	0.0557846	0.158927	0.141776	0.173407
		98834.1	302.23	morin	2.38667	2.18864	2.37652	1.43088	1.48017	1.58952	0.530616	0.62737	0.731585	1.25107	1.07212	1.32764	1.61325	1.49008	1.50219	1.27333	1.30587	1.20385	0.711157	0.73611	0.793967	0.54297	0.577708	0.515204
		188974	302.23	quercetin	10.0723	10.1526	10.1846	8.9807	8.68649	8.81136	22.3813	22.635	22.9406	31.2188	31.8132	31.465	31.5978	32.6444	32.2934	49.3221	48.7367	47.8006	50.1763	49.6648	49.2637	52.6331	52.2785	52.1329
		337566	286.23	kaempferol	0.295044	0.331233	0.293551	0.353381	0.35606	0.354025	0.98366	1.02273	1.01008	1.99829	2.0419	1.99829	2.16858	2.20633	2.21936	3.2042	3.262	3.20559	3.11571	3.16476	3.12606	3.20878	3.27777	3.22513
		53707.5	448.37	cyanidin-3-glucoside	815.695	838.215	848.456	696.901	682.936	696.118	609.233	594.561	600.949	704.413	693.187	683.89	585.711	587.472	589.693	479.733	483.535	485.121	336.097	333.194	339.001	326.516	321.163	328.345
		53707.5	594.51	cyanidin-3-rutinoside	1355.22	1390.19	1394.89	1138.95	1125.31	1149.08	1293.73	1253.81	1238.87	1293.3	1307.7	1290.44	1208.62	1204.68	1191.41	1203.19	1210.95	1217.2	888.129	878.481	884.908	815.17	819.242	811.715
		53707.5	432.377	pelargonidin-3-O-glucoside	36.5993	35.2919	36.4061	28.6492	29.024	29.0656	21.2017	20.4762	20.3516	20.0608	20.2398	21.5051	13.1199	13.0706	13.0117	6.65623	6.65623	6.65623	3.11075	3.45532	3.09401	3.32007	3.54613	3.58155
		26889.9	286.23	cyanidin	0	0	0	0	0	0	10.9323	11.2193	11.5135	31.1454	30.9572	30.3922	28.3945	28.3685	30.4212	117.036	115.49	115.248	70.7852	72.6484	65.8576	66.5738	63.8484	66.0267
		53707.5	464.37	delphindin-3-O-glucoside	11.2727	11.0102	11.0219	9.56936	9.61847	8.96654	8.27898	8.37375	8.45053	6.60645	6.14059	6.04997	3.59789	3.69023	3.68331	2.74122	2.80866	2.76715	0.862553	0.651584	0.70104	0.657117	0.760873	0.780586
			Descriptives	protocatechuic acid
			VAR00001
				N	Mean	Std. Deviation	Std. Error	95% Confidence Interval for Mean		Minimum	Maximum
								Lower Bound	Upper Bound
		g	1	3	2.1566	0.07775	0.04489	1.9635	2.3497	2.08	2.23
		g	2	3	2.038	0.1112	0.0642	1.7618	2.3142	1.91	2.11
		f	3	3	30.7449	0.96824	0.55901	28.3397	33.1502	29.73	31.65
		e	4	3	37.3968	0.79413	0.45849	35.4241	39.3696	36.76	38.29
		d	5	3	50.802	0.9246	0.53382	48.5052	53.0988	49.74	51.45
		a	6	3	84.5625	1.09155	0.63021	81.8509	87.274	83.57	85.73
		c	7	3	76.882	2.32597	1.3429	71.104	82.66	74.29	78.78
		b	8	3	80.1247	1.44381	0.83358	76.538	83.7113	78.59	81.45
			Total	24	45.5884	31.8884	6.5092	32.1231	59.0537	1.91	85.73
			Descriptives	taxifolin-3-O-glucoside
			VAR00002
				N	Mean	Std. Deviation	Std. Error	95% Confidence Interval for Mean		Minimum	Maximum
								Lower Bound	Upper Bound
		a	1	3	490.824	6.00747	3.46841	475.901	505.748	484.32	496.16
		c	2	3	406.234	15.213	8.78323	368.443	444.025	391.7	422.05
		d	3	3	355.197	2.77867	1.60427	348.295	362.1	352.63	358.14
		b	4	3	418.751	1.42006	0.81987	415.224	422.279	417.31	420.14
		e	5	3	334.729	2.76565	1.59675	327.858	341.599	331.56	336.68
		f	6	3	271.525	1.81043	1.04525	267.028	276.022	269.93	273.49
		g	7	3	183.215	0.84122	0.48568	181.126	185.305	182.43	184.11
		h	8	3	171.362	0.97869	0.56505	168.93	173.793	170.24	172.05
			Total	24	328.98	108.664	22.1809	283.095	374.864	170.24	496.16
			Descriptives	2, 4, 6-trihydroxybenzaldehyde
			VAR00003
				N	Mean	Std. Deviation	Std. Error	95% Confidence Interval for Mean		Minimum	Maximum
								Lower Bound	Upper Bound
		g	1	3	2.2219	0.13597	0.0785	1.8841	2.5596	2.12	2.38
		g	2	3	2.1327	0.10075	0.05817	1.8824	2.383	2.02	2.2
		f	3	3	93.9228	1.10042	0.63533	91.1892	96.6564	92.76	94.95
		e	4	3	116.58	0.97118	0.56071	114.168	118.993	115.63	117.57
		d	5	3	164.959	1.56628	0.90429	161.068	168.85	163.45	166.58
		a	6	3	261.013	2.67652	1.54529	254.364	267.662	259.2	264.09
		b	7	3	246.999	3.766	2.1743	237.643	256.354	242.74	249.9
		c	8	3	233.661	2.60278	1.50271	227.196	240.127	230.83	235.94
			Total	24	140.186	99.6766	20.3464	98.0964	182.276	2.02	264.09
			Descriptives	taxifolin
			VAR00004
				N	Mean	Std. Deviation	Std. Error	95% Confidence Interval for Mean		Minimum	Maximum
								Lower Bound	Upper Bound
		g	1	3	0.1271	0.01306	0.00754	0.0947	0.1596	0.11	0.14
		g	2	3	0.1311	0.00434	0.00251	0.1203	0.1419	0.13	0.14
		f	3	3	25.3837	0.40647	0.23468	24.374	26.3934	24.95	25.75
		e	4	3	38.8346	0.16938	0.09779	38.4138	39.2554	38.65	38.98
		d	5	3	48.2671	1.17734	0.67974	45.3424	51.1917	47.05	49.4
		a	6	3	125.673	1.70289	0.98316	121.443	129.904	124.08	127.47
		b	7	3	119.87	1.506	0.86949	116.129	123.611	118.22	121.16
		c	8	3	102.905	0.66966	0.38663	101.242	104.569	102.18	103.51
			Total	24	57.649	49.3239	10.0682	36.8214	78.4766	0.11	127.47
			Descriptives	isovanillic acid
			VAR00005
				N	Mean	Std. Deviation	Std. Error	95% Confidence Interval for Mean		Minimum	Maximum
								Lower Bound	Upper Bound
		g	1	3	0	0	0	0	0	0	0
		g	2	3	0	0	0	0	0	0	0
		f	3	3	23.3295	0.5022	0.28994	22.082	24.577	22.87	23.86
		e	4	3	32.1032	0.52073	0.30064	30.8097	33.3968	31.67	32.68
		b	5	3	39.3945	1.70771	0.98595	35.1523	43.6366	37.92	41.27
		d	6	3	35.7966	0.42675	0.24638	34.7365	36.8567	35.31	36.07
		a	7	3	46.1454	0.12709	0.07338	45.8296	46.4611	46.03	46.28
		c	8	3	36.1045	1.02338	0.59085	33.5623	38.6467	34.94	36.86
			Total	24	26.6092	16.8621	3.44195	19.489	33.7294	0	46.28
			Descriptives	rutin
			VAR00006
				N	Mean	Std. Deviation	Std. Error	95% Confidence Interval for Mean		Minimum	Maximum
								Lower Bound	Upper Bound
		a	1	3	50.8511	0.29239	0.16881	50.1248	51.5774	50.51	51.04
		b	2	3	43.9371	0.7688	0.44387	42.0273	45.8469	43.06	44.5
		c	3	3	38.541	0.94392	0.54497	36.1962	40.8859	37.49	39.33
		d	4	3	32.9552	0.32649	0.1885	32.1441	33.7662	32.66	33.31
		e	5	3	24.4003	0.40648	0.23468	23.3906	25.4101	23.96	24.76
		f	6	3	16.5059	0.25928	0.1497	15.8618	17.15	16.24	16.76
		g	7	3	8.9877	0.09134	0.05273	8.7608	9.2146	8.9	9.08
		g	8	3	8.7764	0.02707	0.01563	8.7092	8.8436	8.75	8.8
			Total	24	28.1193	15.2761	3.11822	21.6688	34.5699	8.75	51.04
			Descriptives	quercetin-3-O-glucoside
			VAR00007
				N	Mean	Std. Deviation	Std. Error	95% Confidence Interval for Mean		Minimum	Maximum
								Lower Bound	Upper Bound
		c	1	3	11.1498	0.27355	0.15793	10.4703	11.8293	10.96	11.46
		d	2	3	8.673	0.50541	0.2918	7.4174	9.9285	8.1	9.05
		b	3	3	17.4039	0.41281	0.23834	16.3784	18.4294	16.93	17.71
		a	4	3	18.612	0.18856	0.10887	18.1436	19.0804	18.42	18.8
		c	5	3	11.4281	0.09448	0.05455	11.1934	11.6628	11.32	11.49
		d	6	3	8.9839	0.06423	0.03709	8.8244	9.1435	8.93	9.05
		e	7	3	5.3172	0.0863	0.04983	5.1028	5.5316	5.25	5.41
		d	8	3	8.7757	0.06283	0.03628	8.6197	8.9318	8.71	8.83
			Total	24	11.293	4.35739	0.88945	9.453	13.1329	5.25	18.8
			Descriptives	taxifolin-3-O-rutinoside
			VAR0008
				N	Mean	Std. Deviation	Std. Error	95% Confidence Interval for Mean		Minimum	Maximum
								Lower Bound	Upper Bound
		a	1	3	13.2413	0.79747	0.46042	11.2603	15.2223	12.36	13.92
		b	2	3	11.6871	0.13049	0.07534	11.3629	12.0112	11.54	11.76
		c	3	3	8.7924	0.10578	0.06107	8.5296	9.0551	8.69	8.9
		d	4	3	5.8659	0.18297	0.10563	5.4114	6.3204	5.67	6.03
		e	5	3	4.1823	0.10225	0.05903	3.9283	4.4363	4.07	4.27
		f	6	3	2.3156	0.1274	0.07356	1.9991	2.6321	2.21	2.46
		g	7	3	0.9135	0.0339	0.01957	0.8293	0.9977	0.89	0.95
		g	8	3	1.0864	0.06491	0.03748	0.9251	1.2477	1.04	1.16
			Total	24	6.0105	4.56796	0.93243	4.0817	7.9394	0.89	13.92
			Descriptives	quercetin-3-O-rhamnoside
			VAR0009
				N	Mean	Std. Deviation	Std. Error	95% Confidence Interval for Mean		Minimum	Maximum
								Lower Bound	Upper Bound
		b	1	3	0.7466	0.03985	0.02301	0.6476	0.8456	0.72	0.79
		c	2	3	0.6236	0.01054	0.00609	0.5974	0.6498	0.62	0.64
		a	3	3	1.6067	0.02867	0.01655	1.5355	1.6779	1.58	1.64
		b	4	3	0.7835	0.03422	0.01976	0.6985	0.8685	0.74	0.81
		d	5	3	0.241	0.03598	0.02077	0.1516	0.3304	0.2	0.27
		d	6	3	0.2149	0.03157	0.01823	0.1365	0.2934	0.19	0.25
		f	7	3	0.0555	0.00419	0.00242	0.0451	0.0659	0.05	0.06
		e	8	3	0.158	0.01583	0.00914	0.1187	0.1974	0.14	0.17
			Total	24	0.5537	0.48792	0.0996	0.3477	0.7598	0.05	1.64
			Descriptives	morin
			VAR00010
				N	Mean	Std. Deviation	Std. Error	95% Confidence Interval for Mean		Minimum	Maximum
								Lower Bound	Upper Bound
		a	1	3	2.3173	0.11152	0.06439	2.0402	2.5943	2.19	2.39
		b	2	3	1.5002	0.0812	0.04688	1.2985	1.7019	1.43	1.59
		de	3	3	0.6299	0.10051	0.05803	0.3802	0.8795	0.53	0.73
		c	4	3	1.2169	0.13114	0.07571	0.8912	1.5427	1.07	1.33
		b	5	3	1.5352	0.06789	0.0392	1.3665	1.7038	1.49	1.61
		c	6	3	1.261	0.05211	0.03009	1.1316	1.3905	1.2	1.31
		d	7	3	0.7471	0.04248	0.02453	0.6416	0.8526	0.71	0.79
		e	8	3	0.5453	0.03132	0.01808	0.4675	0.6231	0.52	0.58
			Total	24	1.2191	0.56511	0.11535	0.9805	1.4577	0.52	2.39
			Descriptives	quercetin
			VAR00011
				N	Mean	Std. Deviation	Std. Error	95% Confidence Interval for Mean		Minimum	Maximum
								Lower Bound	Upper Bound
		f	1	3	10.1365	0.05784	0.03339	9.9928	10.2802	10.07	10.18
		g	2	3	8.8262	0.14766	0.08525	8.4594	9.193	8.69	8.98
		e	3	3	22.6523	0.28003	0.16167	21.9567	23.3479	22.38	22.94
		d	4	3	31.499	0.29868	0.17244	30.7571	32.241	31.22	31.81
		d	5	3	32.1785	0.53269	0.30755	30.8552	33.5018	31.6	32.64
		c	6	3	48.6198	0.76744	0.44308	46.7134	50.5262	47.8	49.32
		b	7	3	49.7016	0.45743	0.2641	48.5653	50.8379	49.26	50.18
		a	8	3	52.3482	0.2573	0.14855	51.709	52.9873	52.13	52.63
			Total	24	31.9953	16.5787	3.38411	24.9947	38.9958	8.69	52.63
			Descriptives	kaempferol
			VAR00012
				N	Mean	Std. Deviation	Std. Error	95% Confidence Interval for Mean		Minimum	Maximum
								Lower Bound	Upper Bound
		g	1	3	0.3066	0.02134	0.01232	0.2536	0.3596	0.29	0.33
		f	2	3	0.3545	0.0014	0.00081	0.351	0.358	0.35	0.36
		e	3	3	1.0055	0.01994	0.01151	0.956	1.055	0.98	1.02
		d	4	3	2.0128	0.02518	0.01454	1.9503	2.0754	2	2.04
		c	5	3	2.1981	0.02637	0.01523	2.1326	2.2636	2.17	2.22
		a	6	3	3.2239	0.03297	0.01904	3.142	3.3058	3.2	3.26
		b	7	3	3.1355	0.02585	0.01493	3.0713	3.1997	3.12	3.16
		a	8	3	3.2372	0.03605	0.02081	3.1477	3.3268	3.21	3.28
			Total	24	1.9343	1.19186	0.24329	1.431	2.4376	0.29	3.28
			Descriptives	cyanidin-3-O-glucoside
			VAR00013
				N	Mean	Std. Deviation	Std. Error	95% Confidence Interval for Mean		Minimum	Maximum
								Lower Bound	Upper Bound
		a	1	3	834.122	16.7593	9.67601	792.49	875.755	815.7	848.46
		b	2	3	691.985	7.84671	4.5303	672.493	711.477	682.94	696.9
		c	3	3	601.581	7.35628	4.24715	583.307	619.855	594.56	609.23
		b	4	3	693.83	10.2767	5.93328	668.301	719.359	683.89	704.41
		c	5	3	587.625	1.99551	1.15211	582.668	592.582	585.71	589.69
		d	6	3	482.797	2.76895	1.59865	475.918	489.675	479.73	485.12
		e	7	3	336.098	2.9034	1.67628	328.885	343.31	333.19	339
		e	8	3	325.341	3.73234	2.15486	316.07	334.613	321.16	328.35
			Total	24	569.172	170.857	34.8761	497.026	641.319	321.16	848.46
			Descriptives	cyanidin-3-O-rutinoside
			VAR00014
				N	Mean	Std. Deviation	Std. Error	95% Confidence Interval for Mean		Minimum	Maximum
								Lower Bound	Upper Bound
		a	1	3	1380.1	21.6708	12.5116	1326.26	1433.93	1355.22	1394.89
		e	2	3	1137.78	11.9267	6.8859	1108.15	1167.4	1125.31	1149.08
		c	3	3	1262.14	28.3664	16.3773	1191.67	1332.6	1238.87	1293.73
		b	4	3	1297.15	9.24979	5.34037	1274.17	1320.12	1290.44	1307.7
		d	5	3	1201.57	9.0188	5.207	1179.17	1223.97	1191.41	1208.62
		d	6	3	1210.45	7.01848	4.05212	1193.01	1227.88	1203.19	1217.2
		f	7	3	883.839	4.91225	2.83609	871.637	896.042	878.48	888.13
		g	8	3	815.376	3.76757	2.17521	806.016	824.735	811.71	819.24
			Total	24	1148.55	190.268	38.8382	1068.21	1228.89	811.71	1394.89
			Descriptives	pelargonidin-3-O-glucoside
			VAR00015
				N	Mean	Std. Deviation	Std. Error	95% Confidence Interval for Mean		Minimum	Maximum
								Lower Bound	Upper Bound
		a	1	3	36.0991	0.70571	0.40744	34.346	37.8522	35.29	36.6
		b	2	3	28.9129	0.22935	0.13241	28.3432	29.4826	28.65	29.07
		c	3	3	20.6765	0.4591	0.26506	19.536	21.817	20.35	21.2
		c	4	3	20.6019	0.78727	0.45453	18.6462	22.5576	20.06	21.51
		d	5	3	13.0674	0.05417	0.03128	12.9328	13.202	13.01	13.12
		e	6	3	6.6562	0	0	6.6562	6.6562	6.66	6.66
		f	7	3	3.22	0.20394	0.11775	2.7134	3.7266	3.09	3.46
		f	8	3	3.4826	0.14185	0.0819	3.1302	3.835	3.32	3.58
			Total	24	16.5896	11.5788	2.36352	11.7003	21.4789	3.09	36.6
			Descriptives	pelargonidin-3-O-rutinoside
			VAR00016
				N	Mean	Std. Deviation	Std. Error	95% Confidence Interval for Mean		Minimum	Maximum
								Lower Bound	Upper Bound
		a	1	3	31.7799	1.107	0.63912	29.03	34.5299	30.53	32.65
		c	2	3	24.6167	0	0	24.6167	24.6167	24.62	24.62
		a	3	3	32.5269	0.24105	0.13917	31.9281	33.1257	32.39	32.81
		a	4	3	32.5716	0.49254	0.28437	31.348	33.7951	32.05	33.03
		b	5	3	25.9507	0.68508	0.39553	24.2489	27.6525	25.16	26.35
		d	6	3	20.9286	0	0	20.9286	20.9286	20.93	20.93
		e	7	3	12.3706	0.27687	0.15985	11.6828	13.0584	12.18	12.69
		f	8	3	11.1255	0.49362	0.28499	9.8993	12.3517	10.56	11.42
			Total	24	23.9838	8.25831	1.68572	20.4966	27.471	10.56	33.03
			Descriptives	cyanidin
			VAR00017
				N	Mean	Std. Deviation	Std. Error	95% Confidence Interval for Mean		Minimum	Maximum
								Lower Bound	Upper Bound
		f	1	3	0	0	0	0	0	0	0
		f	2	3	0	0	0	0	0	0	0
		e	3	3	11.2217	0.2906	0.16778	10.4998	11.9436	10.93	11.51
		d	4	3	30.8316	0.392	0.22632	29.8579	31.8054	30.39	31.15
		d	5	3	29.0614	1.17769	0.67994	26.1358	31.9869	28.37	30.42
		a	6	3	115.925	0.96973	0.55987	113.516	118.334	115.25	117.04
		b	7	3	69.7637	3.50873	2.02577	61.0476	78.4799	65.86	72.65
		c	8	3	65.4829	1.44177	0.83241	61.9014	69.0645	63.85	66.57
			Total	24	40.2858	38.8011	7.92024	23.9015	56.67	0	117.04
			Descriptives	delphindin-3-O-glucoside
			VAR00018
				N	Mean	Std. Deviation	Std. Error	95% Confidence Interval for Mean		Minimum	Maximum
								Lower Bound	Upper Bound
		a	1	3	11.1016	0.14828	0.08561	10.7333	11.4699	11.01	11.27
		b	2	3	9.3848	0.36305	0.2096	8.4829	10.2866	8.97	9.62
		c	3	3	8.3678	0.08593	0.04961	8.1543	8.5812	8.28	8.45
		d	4	3	6.2657	0.29858	0.17239	5.524	7.0074	6.05	6.61
		e	5	3	3.6571	0.05143	0.0297	3.5294	3.7849	3.6	3.69
		f	6	3	2.7723	0.03402	0.01964	2.6878	2.8568	2.74	2.81
		g	7	3	0.7384	0.11033	0.0637	0.4643	1.0125	0.65	0.86
		g	8	3	0.7329	0.06633	0.0383	0.5681	0.8976	0.66	0.78
			Total	24	5.3776	3.81487	0.77871	3.7667	6.9884	0.65	11.27

## Sheet: Fig.2
		NF	F0	F1	F2	F3	F5	F7	F9		control	blank
	sample1	1.787	1.688	1.331	1.297	1.092	0.857	0.638	0.695		1.38	0.044
	sample2	1.792	1.826	1.278	1.313	1.179	0.867	0.646	0.68		1.359	0.045
	sample3	1.774	1.8	1.296	1.291	1.135	0.86	0.629	0.675		1.487	0.045
	background1	0.614	0.542	0.606	0.682	0.689	0.637	0.532	0.595		1.47	0.047
	background2	0.604	0.544	0.633	0.706	0.673	0.673	0.55	0.59	Avg.	1.424	0.04525
	background3	0.611	0.548	0.62	0.689	0.69	0.654	0.543	0.592
	Inhibition1	14.9384	16.8963	47.4257	55.4025	70.7759	84.0464	92.3133	92.7484	control-blank	1.37875
	Inhibition2	13.8506	7.03408	53.227	55.9826	63.3067	85.9318	93.0384	93.4735
	Inhibition3	15.6635	9.20957	50.979	56.3452	67.7302	85.0616	93.7636	93.9811
		14.9384		Descriptives
		13.8506		VAR00001
		15.6635			N	Mean	Std. Deviation	Std. Error	95% Confidence Interval for Mean		Minimum	Maximum
		16.8963							Lower Bound	Upper Bound
		7.03408	f	1	3	14.8296	0.92937	0.53657	12.5209	17.1383	13.85	15.7
		9.20957	f	2	3	11.0467	5.18141	2.99149	-1.8247	23.918	7.03	16.9
		47.4257	e	3	3	50.5257	2.92115	1.68652	43.2692	57.7823	47.43	53.23
		53.227	d	4	3	55.9101	0.47552	0.27454	54.7288	57.0913	55.4	56.35
		50.979	c	5	3	67.2831	3.75799	2.16967	57.9477	76.6184	63.31	70.78
		55.4025	b	6	3	85.0193	0.94416	0.54511	82.6739	87.3648	84.05	85.93
		55.9826	a	7	3	93.0505	0.74337	0.42918	91.2039	94.8971	92.31	93.8
		56.3452	a	8	3	93.4131	0.63667	0.36758	91.8315	94.9947	92.75	94.02
		70.7759		Total	24	58.8848	31.1854	6.3657	45.7163	72.0532	7.03	94.02
		63.3067
		67.7302
		84.0464
		85.9318
		85.0616
		92.3133
		93.0384
		93.7636
		92.7484
		93.4735
		93.9811

## Sheet: Fig.3
	ID	NF-1	NF-2	NF-3	F0-1	F0-2	F0-3	F1-1	F1-2	F1-3	F2-1	F2-2	F2-3	F3-1	F3-2	F3-3	F5-1	F5-2	F5-3	F7-1	F7-2	F7-3	F9-1	F9-2	F9-3
	C-3-O-RU	2.1566	2.07885	2.23435	2.11353	1.91032	2.09017	29.7273	30.8528	31.6547	36.7608	38.2869	37.1427	49.7426	51.2173	51.4462	83.5723	84.3821	85.733	74.2886	78.7835	77.5739	80.3298	81.4549	78.5892
	C-3-O-G	484.317	491.998	496.159	422.048	391.704	404.95	354.822	358.145	352.625	417.305	420.144	418.806	331.563	336.677	335.945	269.927	271.157	273.491	184.106	183.107	182.434	170.241	172.05	171.793
	T-3-O-G	2.12015	2.37631	2.1692	2.18049	2.20074	2.01699	94.0645	92.7584	94.9455	116.546	115.626	117.568	164.85	163.45	166.577	259.757	264.087	259.196	248.358	249.896	242.742	230.826	234.217	235.941
	THBZE	0.11213	0.133091	0.136122	0.128798	0.128419	0.136122	25.7528	24.9481	25.4502	38.869	38.6506	38.9841	48.36	49.3952	47.046	125.478	127.466	124.077	120.23	121.163	118.216	103.507	102.184	103.025
	taxifolin	0	0	0	0	0	0	22.8662	23.2592	23.8632	31.9523	32.6828	31.6747	37.923	38.9933	41.267	35.3051	36.0734	36.0112	46.132	46.0255	46.2786	34.9388	36.5197	36.855
	cyanidin	51.042	50.5145	50.9969	44.2521	43.0609	44.4985	39.3251	38.8046	37.4933	33.3068	32.6617	32.897	23.9607	24.4777	24.7626	16.238	16.524	16.7556	8.89978	8.98126	9.0821	8.7846	8.7984	8.74617
	IVA	11.023	10.9626	11.4637	8.87328	8.09809	9.04749	17.7088	16.9341	17.5688	18.6146	18.7992	18.4221	11.3198	11.4707	11.4937	8.92791	8.96988	9.05405	5.29049	5.24744	5.41372	8.78569	8.83302	8.70854
	Q-3-O-G	13.9243	12.3649	13.4346	11.7624	11.5364	11.7624	8.69145	8.90241	8.78324	5.90056	6.02912	5.66813	4.20521	4.27109	4.07049	2.20809	2.28235	2.45631	0.893943	0.952667	0.893943	1.03804	1.16018	1.06099
	PA	0.730838	0.791904	0.71701	0.635648	0.616242	0.618794	1.60743	1.63502	1.5777	0.806325	0.74419	0.800093	0.271445	0.201299	0.250259	0.186997	0.249191	0.208658	0.051215	0.0595827	0.0557846	0.158927	0.141776	0.173407
	quercetin	2.38667	2.18864	2.37652	1.43088	1.48017	1.58952	0.530616	0.62737	0.731585	1.25107	1.07212	1.32764	1.61325	1.49008	1.50219	1.27333	1.30587	1.20385	0.711157	0.73611	0.793967	0.54297	0.577708	0.515204
	rutin	10.0723	10.1526	10.1846	8.9807	8.68649	8.81136	22.3813	22.635	22.9406	31.2188	31.8132	31.465	31.5978	32.6444	32.2934	49.3221	48.7367	47.8006	50.1763	49.6648	49.2637	52.6331	52.2785	52.1329
	P-3-O-G	0.295044	0.331233	0.293551	0.353381	0.35606	0.354025	0.98366	1.02273	1.01008	1.99829	2.0419	1.99829	2.16858	2.20633	2.21936	3.2042	3.262	3.20559	3.11571	3.16476	3.12606	3.20878	3.27777	3.22513
	P-3-O-RU	815.695	838.215	848.456	696.901	682.936	696.118	609.233	594.561	600.949	704.413	693.187	683.89	585.711	587.472	589.693	479.733	483.535	485.121	336.097	333.194	339.001	326.516	321.163	328.345
	T-3-O-RU	1355.22	1390.19	1394.89	1138.95	1125.31	1149.08	1293.73	1253.81	1238.87	1293.3	1307.7	1290.44	1208.62	1204.68	1191.41	1203.19	1210.95	1217.2	888.129	878.481	884.908	815.17	819.242	811.715
	D-3-O-G	36.5993	35.2919	36.4061	28.6492	29.024	29.0656	21.2017	20.4762	20.3516	20.0608	20.2398	21.5051	13.1199	13.0706	13.0117	6.65623	6.65623	6.65623	3.11075	3.45532	3.09401	3.32007	3.54613	3.58155
	morin	30.5333	32.648	32.1585	24.6167	24.6167	24.6167	32.3877	32.8052	32.3877	32.0486	32.6393	33.0267	26.3462	25.1596	26.3462	20.9286	20.9286	20.9286	12.6884	12.2416	12.1817	11.4199	10.5556	11.401
	Q-3-O-RH	0	0	0	0	0	0	10.9323	11.2193	11.5135	31.1454	30.9572	30.3922	28.3945	28.3685	30.4212	117.036	115.49	115.248	70.7852	72.6484	65.8576	66.5738	63.8484	66.0267
	kaempferol	11.2727	11.0102	11.0219	9.56936	9.61847	8.96654	8.27898	8.37375	8.45053	6.60645	6.14059	6.04997	3.59789	3.69023	3.68331	2.74122	2.80866	2.76715	0.862553	0.651584	0.70104	0.657117	0.760873	0.780586
	α-GI	14.9384	13.8506	15.6635	16.8963	7.03408	9.20957	47.4257	53.227	50.979	55.4025	55.9826	56.3452	70.7759	63.3067	67.7302	84.0464	85.9318	85.0616	92.3133	93.0384	93.7636	92.7484	93.4735	93.9811
	correction
	id	C-3-O-RU	C-3-O-G	T-3-O-G	THBZE	taxifolin	cyanidin	IVA	Q-3-O-G	PA	quercetin	rutin	P-3-O-G	P-3-O-RU	T-3-O-RU	D-3-O-G	morin	Q-3-O-RH	kaempferol	GI
	C-3-O-RU	1	0.784348	0.796522	-0.482609	-0.472711	-0.444701	-0.545471	0.781739	-0.465217	-0.586957	0.71913	0.697999	0.862311	0.696825	0.701739	0.454783	0.790435	-0.631007	-0.633043
	C-3-O-G	0.784348	1	0.981739	-0.826087	-0.818874	-0.77987	-0.786003	0.586957	-0.833043	-0.893043	0.944348	0.916449	0.778651	0.913441	0.926957	0.656522	0.782609	-0.909763	-0.907826
	T-3-O-G	0.796522	0.981739	1	-0.816522	-0.817134	-0.777679	-0.780308	0.591304	-0.817391	-0.873043	0.932174	0.923412	0.807845	0.916051	0.921739	0.647826	0.78	-0.897152	-0.908696
	THBZE	-0.482609	-0.826087	-0.816522	1	0.974995	0.960817	0.835512	-0.4	0.945217	0.88087	-0.887826	-0.89208	-0.610895	-0.911701	-0.891304	-0.454783	-0.696522	0.919765	0.891304
	taxifolin	-0.472711	-0.818874	-0.817134	0.974995	1	0.95752	0.8243	-0.375299	0.953686	0.887149	-0.881931	-0.888792	-0.619308	-0.908201	-0.902805	-0.449228	-0.706241	0.909526	0.881061
	cyanidin	-0.444701	-0.77987	-0.777679	0.960817	0.95752	1	0.75894	-0.339988	0.945044	0.885459	-0.876696	-0.876582	-0.591447	-0.887159	-0.879325	-0.518745	-0.637916	0.908877	0.877572
	IVA	-0.545471	-0.786003	-0.780308	0.835512	0.8243	0.75894	1	-0.335607	0.783813	0.830254	-0.84778	-0.892369	-0.551051	-0.898555	-0.864428	-0.368028	-0.729923	0.794062	0.859171
	Q-3-O-G	0.781739	0.586957	0.591304	-0.4	-0.375299	-0.339988	-0.335607	1	-0.323478	-0.407826	0.492174	0.508268	0.847061	0.515877	0.493043	0.19913	0.813043	-0.40748	-0.469565
	PA	-0.465217	-0.833043	-0.817391	0.945217	0.953686	0.945044	0.783813	-0.323478	1	0.918261	-0.886957	-0.871193	-0.63791	-0.866464	-0.889565	-0.469565	-0.684348	0.948467	0.882609
	quercetin	-0.586957	-0.893043	-0.873043	0.88087	0.887149	0.885459	0.830254	-0.407826	0.918261	1	-0.964348	-0.932115	-0.674511	-0.93084	-0.942609	-0.596522	-0.751304	0.927593	0.96087
	rutin	0.71913	0.944348	0.932174	-0.887826	-0.881931	-0.876696	-0.84778	0.492174	-0.886957	-0.964348	1	0.958225	0.739	0.966072	0.970435	0.634783	0.78	-0.951076	-0.968696
	P-3-O-G	0.697999	0.916449	0.923412	-0.89208	-0.888792	-0.876582	-0.892369	0.508268	-0.871193	-0.932115	0.958225	1	0.738771	0.979103	0.962577	0.626632	0.791993	-0.908379	-0.956484
	P-3-O-RU	0.862311	0.778651	0.807845	-0.610895	-0.619308	-0.591447	-0.551051	0.847061	-0.63791	-0.674511	0.739	0.738771	1	0.719269	0.725492	0.369936	0.90632	-0.713011	-0.706755
	T-3-O-RU	0.696825	0.913441	0.916051	-0.911701	-0.908201	-0.887159	-0.898555	0.515877	-0.866464	-0.93084	0.966072	0.979103	0.719269	1	0.978686	0.591997	0.799478	-0.906243	-0.963462
	D-3-O-G	0.701739	0.926957	0.921739	-0.891304	-0.902805	-0.879325	-0.864428	0.493043	-0.889565	-0.942609	0.970435	0.962577	0.725492	0.978686	1	0.601739	0.783478	-0.926288	-0.946087
	morin	0.454783	0.656522	0.647826	-0.454783	-0.449228	-0.518745	-0.368028	0.19913	-0.469565	-0.596522	0.634783	0.626632	0.369936	0.591997	0.601739	1	0.223478	-0.570124	-0.59913
	Q-3-O-RH	0.790435	0.782609	0.78	-0.696522	-0.706241	-0.637916	-0.729923	0.813043	-0.684348	-0.751304	0.78	0.791993	0.90632	0.799478	0.783478	0.223478	1	-0.715373	-0.774783
	kaempferol	-0.631007	-0.909763	-0.897152	0.919765	0.909526	0.908877	0.794062	-0.40748	0.948467	0.927593	-0.951076	-0.908379	-0.713011	-0.906243	-0.926288	-0.570124	-0.715373	1	0.912807
	α-GI	-0.633043	-0.907826	-0.908696	0.891304	0.881061	0.877572	0.859171	-0.469565	0.882609	0.96087	-0.968696	-0.956484	-0.706755	-0.963462	-0.946087	-0.59913	-0.774783	0.912807	1
	VIP value
	C-3-O-RU	1.9816
	C-3-O-G	1.70405
	T-3-O-G	1.4147
	THBZE	1.32475
	taxifolin	1.2035
	cyanidin	1.17325
	IVA	0.996164
	Q-3-O-G	0.98034
	PA	0.844186
	quercetin	0.713307
	rutin	0.557968
	P-3-O-G	0.55654
	P-3-O-RU	0.525648
	T-3-O-RU	0.370965
	D-3-O-G	0.36157
	morin	0.335581
	Q-3-O-RH	0.316115
	kaempferol	0.187367
C-3-O-RU
C-3-O-G
T-3-O-G
THBZE
taxifolin
cyanidin
IVA
Q-3-O-G
PA
quercetin
rutin
P-3-O-G
P-3-O-RU
T-3-O-RU
D-3-O-G
morin
Q-3-O-RH
kaempferol
GI

## Sheet: Fig.4
A		Control	2% Glucose	2% Glucose+NF	2% Glucose+F9		Standard	blank
		0.056	0.067	0.067	0.071		0.275	0.048
		0.058	0.065	0.067	0.07		0.267	0.05
		0.054	0.067	0.065	0.071		0.304	0.051
							0.257	0.051
		0.00922259	0.0261307	0.0261307	0.0322791	Avg.	0.27575	0.05
		0.0122968	0.0230565	0.0261307	0.030742
		0.00614839	0.0261307	0.0230565	0.0322791	Standard-blank	0.22575
	protenin 𝜇g/mL	27.4636	41.9244	45.9136	65.361
	GLU(mmol/g protenin)	0.335811	0.62328	0.569127	0.493858
		0.447749	0.549953	0.569127	0.470341
		0.223874	0.62328	0.50217	0.493858
		Descriptives
		GLU
			N	Mean	Std. Deviation	Std. Error	95% Confidence Interval for Mean		Minimum	Maximum
							Lower Bound	Upper Bound
	c	1	3	0.39178	0.0559686	0.0323135	0.252746	0.530814	0.3358	0.4477
	a	2	3	0.598838	0.0423354	0.0244424	0.493671	0.704005	0.55	0.6233
	ab	3	3	0.546808	0.0386571	0.0223187	0.450778	0.642837	0.5022	0.5691
	b	4	3	0.486019	0.0135776	0.007839	0.452291	0.519748	0.4703	0.4939
		Total	12	0.505861	0.0875917	0.0252856	0.450208	0.561514	0.3358	0.6233
B	Control							2% Glucose							2% Glucose+NF							2% Glucose+F9
	1	2	3	4	5	6		1	2	3	4	5	6		1	2	3	4	5	6		1	2	3	4	5	6
0	8513	8472	8468	8713	8716	8806	8614.67	8456	8350	8403	8315.5	8356	8175		7969	8002	7900	8024	8028	8108		7976	7887	7898	7905	7753	7846
20	8011	8077	8151	8261	8393	8470		7928	7979	7953.5	7952	7849	7976		7463	7452	7526	7569	7505	7511		7248	7315	7358	7238	7251	7166
40	8464	8413	8529	8587	8621	8922		8513	8359	8436	8574	8390	8635		7987	7889	7975	7918	7909	7907		7783	7603	7637	7617	7475	7636
60	9227	9121	9256	9273	9177	9688		9389	9035	9212	9563	9099	9737		8766	8629	8697	8576	8689	8668		8505	8115	8379	8230	8173	8225
80	10221	10058	10308	10196	9958	10616		10669	9983	10326	10931	10209	11193		9897	9789	9652	9330	9445	9439		9371	8763	9068	8998	9058	9065
100	11574	11386	11773	11579	11144	12111		12389	11563	11976	12771.5	11521	13154		11326	11077	10972	10396	10630	10650		10613	9722	10133	9973	9955	10059
120	13337	13016	13648	13327	12748	13719		14569	13252	13910.5	15064	13284	15559		13241	12913	12708	11869	12282	12153		12330	10989	11375	11473	11249	11414
140	15796	15405	15922	15492	14619	16061		17372	15371	16371.5	17999.5	15466	18627		15444	15121	14818	13678	14180	14074		14475	12478	13014	12988	13055	13178
160	18573	17740	18849	18056	16837	18688		20833	18268	19550.5	21583	18225	22333		18395	17756	17638	15824	16658	16363		16827	14202	15059	15007	15109	15399
180	22153	21015	22246	21377	19836	22182		24812	21489	23150.5	25785	21424	26758		21917	21306	20847	18387	19703	19458		19735	16652	17504	17479	17531	17858
0	98.8198	98.3439	98.2974	101.141	101.176	102.221		98.1581	96.9277	97.5429	96.5272	96.9973	94.8963		92.505	92.8881	91.704	93.1434	93.1899	94.1185		92.5863	91.5531	91.6808	91.7621	89.9976	91.0772
20	92.9925	93.7587	94.6177	95.8946	97.4268	98.3207		92.0291	92.6211	92.3251	92.3077	91.112	92.5863		86.6313	86.5036	87.3626	87.8618	87.1188	87.1885		84.1356	84.9133	85.4124	84.0195	84.1704	83.1837
40	98.251	97.659	99.0055	99.6788	100.073	103.568		98.8198	97.0322	97.926	99.5279	97.392	100.236		92.7139	91.5763	92.5746	91.913	91.8085	91.7853		90.3459	88.2564	88.6511	88.4189	86.7706	88.6395
60	107.108	105.878	107.445	107.642	106.528	112.459		108.989	104.879	106.934	111.008	105.622	113.028		101.757	100.166	100.956	99.5511	100.863	100.619		98.7269	94.1998	97.2643	95.5347	94.873	95.4767
80	118.646	116.754	119.656	118.356	115.594	123.232		123.847	115.884	119.865	126.888	118.507	129.93		114.885	113.632	112.041	108.304	109.639	109.569		108.78	101.722	105.262	104.45	105.146	105.227
100	134.352	132.17	136.662	134.41	129.361	140.586		143.813	134.225	139.019	148.253	133.737	152.693		131.473	128.583	127.364	120.678	123.394	123.626		123.197	112.854	117.625	115.768	115.559	116.766
120	154.817	151.091	158.427	154.701	147.98	159.252		169.118	153.831	161.475	174.865	154.202	180.611		153.703	149.895	147.516	137.777	142.571	141.073		143.128	127.561	132.042	133.18	130.58	132.495
140	183.362	178.823	184.824	179.833	169.699	186.438		201.656	178.428	190.042	208.94	179.531	216.224		179.276	175.526	172.009	158.776	164.603	163.372		168.027	144.846	151.068	150.766	151.544	152.972
160	215.597	205.928	218.801	209.596	195.446	216.932		241.832	212.057	226.944	250.538	211.558	259.244		213.531	206.114	204.744	183.687	193.368	189.943		195.33	164.858	174.806	174.203	175.387	178.753
180	257.154	243.944	258.234	248.146	230.258	257.491		288.02	249.447	268.733	299.315	248.692	310.61		254.415	247.322	241.994	213.438	228.715	225.871		229.086	193.298	203.188	202.898	203.502	207.298
C		Control	2% Glucose	2% Glucose+taxifolin	2% Glucose+cyandian chloride	2% Glucose+2, 4, 6-trihydroxybenzaldehyde		Standard	blank
		0.057	0.067	0.061	0.061	0.059		0.292	0.05
		0.058	0.068	0.06	0.06	0.059		0.294	0.0496
		0.056	0.068	0.059	0.06	0.059		0.282	0.047
								0.294	0.047
		0.0492875	0.106599	0.0722119	0.0722119	0.0607497	Avg.	0.2905	0.0484
		0.0550186	0.11233	0.0664808	0.0664808	0.0607497
		0.0435564	0.11233	0.0607497	0.0664808	0.0607497	Standard-blank	0.2421
	protenin 𝜇g/mL	235.24	222.2	189.35	157.1	197.93
	GLU(mmol/g protenin)	0.20952	0.479741	0.381367	0.459656	0.306925
		0.233883	0.505534	0.3511	0.423175	0.306925
		0.185157	0.505534	0.320833	0.423175	0.306925
		Descriptives
		GLU
			N	Mean	Std. Deviation	Std. Error	95% Confidence Interval for Mean		Minimum	Maximum
							Lower Bound	Upper Bound
	e	1	3	0.210215	0.0320934	0.0185291	0.13049	0.289939	0.1781	0.2423
	a	2	3	0.499555	0.0075376	0.0043518	0.480831	0.51828	0.495	0.5083
	c	3	3	0.36611	0.0305092	0.0176145	0.290321	0.441899	0.3356	0.3966
	b	4	3	0.45425	0.0150964	0.0087159	0.416748	0.491751	0.4392	0.4693
	d	5	3	0.305654	0.0062266	0.003595	0.290186	0.321122	0.2994	0.3119
		Total	15	0.367157	0.108613	0.0280438	0.307009	0.427305	0.1781	0.5083
D	Control							2% Glucose							2% Glucose+taxifolin							2% Glucose+cyandian chloride							2% Glucose+2, 4, 6-trihydroxybenzaldehyde
	1	2	3	4	5	6		1	2	3	4	5	6		1	2	3	4	5	6		1	2	3	4	5	6		1	2	3	4	5	6
0	5129	5109	5130	5128	5270	5051	5136.17	4919	4782	5057	4977	4984	5017		4961	4992	4933	4918	4986	5000		4912	4865	4814	4880	4852	4889		4859	4841	4956	4654	4778	4865
20	5233	5270	5261	5469	5544	5207		4965	4753	5177	5064	4991	5120		4941	4986	4959	4906	5024	4962		4932	4797	4795	4799	4842	4882		4780	4779	4760	4566	4663	4714
40	5658	5745	5838	5769	6155	5775		5475	5269	5681	5557	5448	5619		5295	5326	5427	5300	5517	5398		5291	5240	5205	5115	5095	5229		5339	5211	5179	4959	5161	5210
60	6197	6299	6462	6523	6811	6400		6206	6046	6366	6337	6106	6351		5910	5961	5882	5782	6099	5861		5677	5648	5697	5679	5683	5802		5824	5881	5855	5417	5749	5778
80	7012	7129	7235	7341	7734	7352		7260	7042	7479	7464	7018	7471		6563	6702	6582	6348	6846	6535		6453	6347	6333	6290	6299	6573		6692	6554	6558	6127	6504	6536
100	8057	8083	8174	8244	8795	8553		8484	8246	8722	8807	8059	8764		7413	7549	7523	7142	7780	7472		7315	7220	7282	7084	7156	7495		7655	7467	7433	7055	7528	7533
120	9042	9183	9371	9308	10015	9784		10034	9847	10221	10431	9418	10326		8515	8642	8649	7966	8851	8519		8292	8145	8237	8008	7979	8497		8789	8534	8612	8161	8682	8577
140	10424	10568	10704	10661	11637	11497		11818	11665	11971	12329	11064	12150		9685	9932	9993	9122	10062	9727		9491	9330	9418	9144	9089	9742		10277	10003	9932	9468	10105	10024
160	12124	12243	12283	12242	13177	13394		14218	14059	14378	14854	12990	14616		11235	11365	11193	10246	11618	11218		10875	10770	10991	10482	10495	11042		11967	11557	11564	11207	11913	11807
180	13964	14205	14076	14036	15136	15853		16811	16787	16835	17634	15152	17234		12900	13088	12979	11631	13166	12933		12528	12211	12499	11833	11944	12677		13991	13361	13262	13148	14048	13867
0	99.8605	99.4711	99.8799	99.841	102.606	98.3418		95.7718	93.1044	98.4586	96.9011	97.0373	97.6798		96.5895	97.1931	96.0444	95.7523	97.0763	97.3489		95.6355	94.7204	93.7275	95.0125	94.4673	95.1877		94.6036	94.2532	96.4922	90.6123	93.0266	94.7204
20	101.885	102.606	102.43	106.48	107.94	101.379		96.6674	92.5398	100.795	98.5949	97.1736	99.6852		96.2001	97.0763	96.5506	95.5187	97.8161	96.609		96.0249	93.3965	93.3576	93.4354	94.2726	95.0514		93.0655	93.046	92.6761	88.899	90.7875	91.7805
40	110.16	111.854	113.665	112.321	119.836	112.438		106.597	102.586	110.608	108.194	106.071	109.401		103.092	103.696	105.662	103.19	107.415	105.098		103.015	102.022	101.34	99.5879	99.1985	101.807		103.949	101.457	100.834	96.5506	100.483	101.438
60	120.654	122.64	125.814	127.001	132.609	124.607		120.829	117.714	123.945	123.38	118.882	123.653		115.066	116.059	114.521	112.574	118.746	114.112		110.53	109.965	110.919	110.569	110.647	112.964		113.392	114.502	113.996	105.468	111.932	112.496
80	136.522	138.8	140.864	142.928	150.579	143.142		141.351	137.106	145.614	145.322	136.639	145.459		127.78	130.486	128.15	123.594	133.29	127.235		125.638	123.575	123.302	122.465	122.64	127.975		130.292	127.605	127.683	119.291	126.631	127.254
100	156.868	157.374	159.146	160.509	171.237	166.525		165.182	160.548	169.815	171.47	156.907	170.633		144.329	146.977	146.471	139.053	151.475	145.478		142.421	140.572	141.779	137.924	139.326	145.926		149.041	145.381	144.719	137.359	146.568	146.666
120	176.046	178.791	182.451	181.225	194.99	190.492		195.36	191.719	199.001	203.089	183.366	201.045		165.785	168.258	168.394	155.096	172.327	165.863		161.443	158.581	160.373	155.914	155.349	165.435		171.12	166.155	167.674	158.893	169.037	166.992
140	202.953	205.757	208.404	207.567	226.57	223.844		230.094	227.115	233.073	240.043	215.414	236.558		188.565	193.374	194.561	177.603	195.905	189.382		184.788	181.653	183.366	178.032	176.961	189.675		200.091	194.756	193.374	184.34	196.742	195.165
160	236.052	238.368	239.147	238.349	256.553	260.778		276.821	273.726	279.936	289.204	252.912	284.57		218.743	221.274	217.925	199.487	226.2	218.412		211.734	209.689	213.992	204.082	204.335	214.985		232.995	225.012	225.148	218.198	231.943	229.88
180	271.876	276.568	274.057	273.278	294.694	308.654		327.306	326.839	327.774	343.33	295.006	335.542		251.16	254.82	252.698	226.453	256.339	251.803		243.917	237.745	243.353	230.386	232.547	246.818		272.402	260.136	258.208	255.989	273.511	269.987

## Sheet: Fig.5
C		Control			2% Glucose			2% Glucose+NF			2% Glucose+F9
	Cytosolic	15	16	14	19	19	17	9	8	8	6	6	8
	Intermediate	9	7	10	5	8	8	12	11	11	9	10	11
	Nuclear	6	7	6	6	3	5	9	11	11	15	14	11
		Control			2% Glucose			2% Glucose+NF			2% Glucose+F9
	Cytosolic	50	53.3333	46.6667	63.3333	63.3333	56.6667	30	26.6667	26.6667	20	20	26.6667
	Intermediate	30	23.3333	33.3333	16.6667	26.6667	26.6667	40	36.6667	36.6667	30	33.3333	36.6667
	Nuclear	20	23.3333	20	20	10	16.6667	30	36.6667	36.6667	50	46.6667	36.6667
		50		Descriptives
		53.3333		Cytosolic
		46.6667			N	Mean	Std. Deviation	Std. Error	95% Confidence Interval for Mean		Minimum	Maximum
		63.3333							Lower Bound	Upper Bound
		63.3333	b	1	3	50	3.33333	1.9245	41.7195	58.2805	46.67	53.33
		56.6667	a	2	3	61.1111	3.849	2.22222	51.5497	70.6726	56.67	63.33
		30	c	3	3	27.7778	1.9245	1.11111	22.9971	32.5585	26.67	30
		26.6667	c	4	3	22.2222	3.849	2.22222	12.6608	31.7837	20	26.67
		26.6667		Total	12	40.2778	16.845	4.86273	29.575	50.9806	20	63.33
		20
		20
		26.6667
		30		Descriptives
		23.3333		Intermediate
		33.3333			N	Mean	Std. Deviation	Std. Error	95% Confidence Interval for Mean		Minimum	Maximum
		16.6667							Lower Bound	Upper Bound
		26.6667	bc	1	3	28.8889	5.09175	2.93972	16.2403	41.5375	23.33	33.33
		26.6667	c	2	3	23.3333	5.7735	3.33333	8.9912	37.6755	16.67	26.67
		40	a	3	3	37.7778	1.9245	1.11111	32.9971	42.5585	36.67	40
		36.6667	ab	4	3	33.3333	3.33333	1.9245	25.0529	41.6138	30	36.67
		36.6667		Total	12	30.8333	6.68558	1.92996	26.5855	35.0811	16.67	40
		30
		33.3333
		36.6667
		20		Descriptives
		23.3333		Nuclear
		20			N	Mean	Std. Deviation	Std. Error	95% Confidence Interval for Mean		Minimum	Maximum
		20							Lower Bound	Upper Bound
		10	c	1	3	21.1111	1.9245	1.11111	16.3304	25.8918	20	23.33
		16.6667	c	2	3	15.5556	5.09175	2.93972	2.9069	28.2042	10	20
		30	b	3	3	34.4444	3.849	2.22222	24.883	44.0059	30	36.67
		36.6667	a	4	3	44.4444	6.93889	4.00617	27.2073	61.6816	36.67	50
		36.6667		Total	12	28.8889	12.4992	3.6082	20.9473	36.8305	10	50
		50
		46.6667
		36.6667
D		Control			2% Glucose			2% Glucose+NF			2% Glucose+F9
	Cytosolic	14	11	10	12	13	15	9	11	9	7	6	6
	Intermediate	14	14	17	14	14	12	9	11	12	10	12	10
	Nuclear	2	5	3	4	3	3	12	8	9	13	12	14
		Control			2% Glucose			2% Glucose+NF			2% Glucose+F9
	Cytosolic	46.6667	36.6667	33.3333	40	43.3333	50	30	36.6667	30	23.3333	20	20
	Intermediate	46.6667	46.6667	56.6667	46.6667	46.6667	40	30	36.6667	40	33.3333	40	33.3333
	Nuclear	6.66667	16.6667	10	13.3333	10	10	40	26.6667	30	43.3333	40	46.6667
		46.6667		Descriptives
		36.6667		Cytosolic
		33.3333			N	Mean	Std. Deviation	Std. Error	95% Confidence Interval for Mean		Minimum	Maximum
		40							Lower Bound	Upper Bound
		43.3333	ab	1	3	38.8889	6.93889	4.00617	21.6517	56.126	33.33	46.67
		50	a	2	3	44.4444	5.09175	2.93972	31.7958	57.0931	40	50
		30	b	3	3	32.2222	3.849	2.22222	22.6608	41.7837	30	36.67
		36.6667	c	4	3	21.1111	1.9245	1.11111	16.3304	25.8918	20	23.33
		30		Total	12	34.1667	9.96205	2.8758	27.8371	40.4963	20	50
		23.3333
		20
		20
		46.6667		Descriptives
		46.6667		Intermediate
		56.6667			N	Mean	Std. Deviation	Std. Error	95% Confidence Interval for Mean		Minimum	Maximum
		46.6667							Lower Bound	Upper Bound
		46.6667	a	1	3	50	5.7735	3.33333	35.6578	64.3422	46.67	56.67
		40	ab	2	3	44.4444	3.849	2.22222	34.883	54.0059	40	46.67
		30	b	3	3	35.5556	5.09175	2.93972	22.9069	48.2042	30	40
		36.6667	b	4	3	35.5556	3.849	2.22222	25.9941	45.117	33.33	40
		40		Total	12	41.3889	7.58232	2.18883	36.5713	46.2065	30	56.67
		33.3333
		40
		33.3333
		6.66667		Descriptives
		16.6667		Nuclear
		10			N	Mean	Std. Deviation	Std. Error	95% Confidence Interval for Mean		Minimum	Maximum
		13.3333							Lower Bound	Upper Bound
		10	c	1	3	11.1111	5.09175	2.93972	-1.5375	23.7597	6.67	16.67
		10	c	2	3	11.1111	1.9245	1.11111	6.3304	15.8918	10	13.33
		40	b	3	3	32.2222	6.93889	4.00617	14.9851	49.4594	26.67	40
		26.6667	a	4	3	43.3333	3.33333	1.9245	35.0529	51.6138	40	46.67
		30		Total	12	24.4444	15.0644	4.34872	14.873	34.0159	6.67	46.67
		43.3333
		40
		46.6667
G			Control	2% Glucose	2% Glucose+NF	2% Glucose+F9
	1		0.014	0.009	0.022	0.023
	2		0.007	0.011	0.011	0.024
	3		0.017	0.012	0.015	0.018
	4		0.015	0.01	0.02	0.015
	5		0.013	0.009	0.014	0.024
	6		0.011	0.01	0.012	0.016
	7		0.012	0.008	0.02	0.014
	8		0.017	0.009	0.015	0.024
	9		0.008	0.007	0.018	0.017
	10		0.015	0.009	0.02	0.016
	11		0.013	0.008	0.018	0.018
	12		0.013	0.008	0.013	0.02
	13		0.015	0.007	0.017	0.02
	14		0.014	0.01	0.013	0.023
	15		0.011	0.009	0.017	0.022
	16		0.017	0.009	0.016	0.017
	17		0.017	0.011	0.013	0.021
	18		0.012	0.012	0.018	0.015
	19		0.015	0.01	0.017	0.018
	20		0.013	0.009	0.02	0.015
	21		0.017	0.01	0.014	0.016
	22		0.015	0.008	0.012	0.02
	23		0.013	0.009	0.02	0.014
	24		0.011	0.007	0.015	0.024
	25		0.012	0.009	0.013	0.015
	26		0.017	0.008	0.02	0.016
	27		0.014	0.008	0.018	0.018
	28		0.017	0.007	0.017	0.016
	29		0.008	0.01	0.017	0.02
	30		0.015	0.009	0.013	0.018
		Avg.	0.0136
	1		102.941	66.1765	161.765	169.118			Descriptives
	2		51.4706	80.8824	80.8824	176.471			sod
	3		125	88.2353	110.294	132.353				N	Mean	Std. Deviation	Std. Error	95% Confidence Interval for Mean		Minimum	Maximum
	4		110.294	73.5294	147.059	110.294								Lower Bound	Upper Bound
	5		95.5882	66.1765	102.941	176.471		c	1	30	100	20.6714	3.77406	92.2812	107.719	51.4706	125
	6		80.8824	73.5294	88.2353	117.647		d	2	30	66.6667	10.0213	1.82962	62.9247	70.4087	51.4706	88.2353
	7		88.2353	58.8235	147.059	102.941		b	3	30	120.098	21.7895	3.97821	111.962	128.234	80.8824	161.765
	8		125	66.1765	110.294	176.471		a	4	30	134.314	29.2167	5.33422	123.404	145.223	44.1176	176.471
	9		58.8235	51.4706	132.353	125			Total	120	105.27	33.2131	3.03192	99.2661	111.273	44.1176	176.471
	10		110.294	66.1765	147.059	117.647
	11		95.5882	58.8235	132.353	132.353
	12		95.5882	58.8235	95.5882	147.059
	13		110.294	51.4706	125	147.059
	14		102.941	73.5294	95.5882	169.118
	15		80.8824	66.1765	125	161.765
	16		125	66.1765	117.647	125
	17		125	80.8824	95.5882	154.412
	18		88.2353	88.2353	132.353	110.294
	19		110.294	73.5294	125	132.353
	20		95.5882	66.1765	147.059	110.294
	21		125	73.5294	102.941	117.647
	22		110.294	58.8235	88.2353	147.059
	23		95.5882	66.1765	147.059	102.941
	24		80.8824	51.4706	110.294	176.471
	25		88.2353	66.1765	95.5882	110.294
	26		125	58.8235	147.059	117.647
	27		102.941	58.8235	132.353	132.353
	28		125	51.4706	125	117.647
	29		58.8235	73.5294	125	147.059
	30		110.294	66.1765	95.5882	132.353
H	1		0.016	0.008	0.014	0.015
	2		0.019	0.011	0.019	0.019
	3		0.02	0.009	0.018	0.023
	4		0.011	0.006	0.017	0.025
	5		0.014	0.007	0.02	0.013
	6		0.014	0.01	0.017	0.016
	7		0.013	0.009	0.016	0.017
	8		0.014	0.008	0.023	0.019
	9		0.015	0.006	0.014	0.02
	10		0.015	0.007	0.016	0.015
	11		0.013	0.007	0.013	0.019
	12		0.018	0.011	0.018	0.017
	13		0.012	0.007	0.008	0.017
	14		0.013	0.009	0.019	0.017
	15		0.015	0.008	0.018	0.015
	16		0.013	0.008	0.016	0.023
	17		0.014	0.011	0.017	0.025
	18		0.016	0.008	0.014	0.019
	19		0.019	0.008	0.016	0.023
	20		0.02	0.009	0.013	0.019
	21		0.011	0.011	0.018	0.015
	22		0.009	0.009	0.008	0.015
	23		0.021	0.01	0.019	0.026
	24		0.014	0.008	0.018	0.019
	25		0.018	0.007	0.014	0.016
	26		0.013	0.009	0.016	0.018
	27		0.015	0.006	0.017	0.019
	28		0.013	0.006	0.017	0.02
	29		0.014	0.009	0.018	0.015
	30		0.012	0.007	0.019	0.021
		Avg.	0.0148
	1		108.108	54.0541	94.5946	101.351			Descriptives
	2		128.378	74.3243	128.378	128.378			gst
	3		135.135	60.8108	121.622	155.405				N	Mean	Std. Deviation	Std. Error	95% Confidence Interval for Mean		Minimum	Maximum
	4		74.3243	40.5405	114.865	168.919								Lower Bound	Upper Bound
	5		94.5946	47.2973	135.135	87.8378		c	1	30	100	19.9493	3.64223	92.5508	107.449	60.8108	141.892
	6		94.5946	67.5676	114.865	108.108		d	2	30	56.0811	10.52	1.92069	52.1528	60.0093	40.5405	74.3243
	7		87.8378	60.8108	108.108	114.865		b	3	30	110.36	21.3176	3.89204	102.4	118.32	54.0541	155.405
	8		94.5946	54.0541	155.405	128.378		a	4	30	126.126	23.0901	4.21565	117.504	134.748	87.8378	175.676
	9		101.351	40.5405	94.5946	135.135			总计	120	98.1419	32.3505	2.95318	92.2943	103.989	40.5405	175.676
	10		101.351	47.2973	108.108	101.351
	11		87.8378	47.2973	87.8378	128.378
	12		121.622	74.3243	121.622	114.865
	13		81.0811	47.2973	54.0541	114.865
	14		87.8378	60.8108	128.378	114.865
	15		101.351	54.0541	121.622	101.351
	16		87.8378	54.0541	108.108	155.405
	17		94.5946	74.3243	114.865	168.919
	18		108.108	54.0541	94.5946	128.378
	19		128.378	54.0541	108.108	155.405
	20		135.135	60.8108	87.8378	128.378
	21		74.3243	74.3243	121.622	101.351
	22		60.8108	60.8108	54.0541	101.351
	23		141.892	67.5676	128.378	175.676
	24		94.5946	54.0541	121.622	128.378
	25		121.622	47.2973	94.5946	108.108
	26		87.8378	60.8108	108.108	121.622
	27		101.351	40.5405	114.865	128.378
	28		87.8378	40.5405	114.865	135.135
	29		94.5946	60.8108	121.622	101.351
	30		81.0811	47.2973	128.378	141.892

## Sheet: Fig.5E
		Ct1	Ct2	Avg. CT		Ct1	Ct2	Avg. CT	ΔCt	ΔΔCt	2^-ΔΔCt
control-1	act-1	16.8285	16.7657	16.7971	daf-16	21.752	21.4754	21.6137	4.8166	0	1		Descriptives
control-2		16.4957	16.2649	16.3803		20.8537	20.4386	20.6461	4.26581	0	1		pcr
control-3		16.4657	16.1468	16.3062		21.2377	21.1947	21.2162	4.90995	0	1			N	Mean	Std. Deviation	Std. Error	95% Confidence Interval for Mean		Minimum	Maximum
2% Glucose-1		16.4993	16.2468	16.373		21.5917	21.4838	21.5377	5.16468	0.348074	0.785632							Lower Bound	Upper Bound
2% Glucose-2		16.1783	16.1205	16.1494		21.4555	21.3195	21.3875	5.23811	0.972302	0.509692	b	1	3	1	0	0	1	1	1	1
2% Glucose-3		16.1602	16.0949	16.1275		21.8973	21.5394	21.7183	5.59081	0.680857	0.623795	c	2	3	0.64	0.13869	0.08007	0.2955	0.9845	0.51	0.79
2% Glucose+NF-1		16.7228	16.585	16.6539		21.4944	21.34	21.4172	4.76331	-0.053293	1.03763	b	3	3	1.0167	0.06469	0.03735	0.856	1.1774	0.94	1.07
2% Glucose+NF-2		16.6072	16.3406	16.4739		20.8601	20.4294	20.6448	4.17085	-0.094956	1.06803	a	4	3	1.3663	0.14242	0.08223	1.0125	1.7201	1.21	1.48
2% Glucose+NF-3		17.117	16.8476	16.9823		22.0152	21.934	21.9746	4.99236	-0.245746	1.18571		Total	12	1.0058	0.28272	0.08161	0.8261	1.1854	0.51	1.48
2% Glucose+F9-1		17.0129	16.7589	16.8859		21.2352	21.1849	21.21	4.32413	-0.492474	1.40686
2% Glucose+F9-2		16.7173	16.6936	16.7055		20.7004	20.1038	20.4021	3.69663	-0.569181	1.48368
2% Glucose+F9-3		16.7108	16.9543	16.8325		21.7308	21.2083	21.4695	4.637	-0.27295	1.20828
		Ct1	Ct2	Avg. CT		Ct1	Ct2	Avg. CT	ΔCt	ΔΔCt	2^-ΔΔCt
control-1	act-1	16.8752	16.794	16.8346	ctl-1	22.8617	22.5949	22.7283	5.89362	0	1		Descriptives
control-2		16.4687	16.824	16.6464		22.1621	21.8935	22.0278	5.38142	0	1		pcr
control-3		16.8337	17.1038	16.9687		21.1356	21.3548	21.2452	4.27644	0	1			N	Mean	Std. Deviation	Std. Error	95% Confidence Interval for Mean		Minimum	Maximum
2% Glucose-1		16.8343	17.0249	16.9296		23.908	23.681	23.7945	6.86491	0.971284	0.510052							Lower Bound	Upper Bound
2% Glucose-2		16.5792	16.2959	16.4375		22.2169	22.4029	22.3099	5.87241	0.490988	0.711538	ab	1	3	1	0	0	1	1	1	1
2% Glucose-3		16.5145	16.2049	16.3597		21.0965	21.0395	21.068	4.70829	0.431853	0.741309	b	2	3	0.6543	0.12583	0.07265	0.3417	0.9669	0.51	0.74
2% Glucose+NF-1		16.3087	16.4029	16.3558		22.8154	22.3743	22.5949	6.23909	0.345467	0.787053	ab	3	3	0.8423	0.11089	0.06402	0.5669	1.1178	0.77	0.97
2% Glucose+NF-2		16.5491	16.6396	16.5943		21.1033	22.935	22.0192	5.42485	0.043431	0.970345	a	4	3	1.1707	0.33464	0.19321	0.3394	2.002	0.88	1.54
2% Glucose+NF-3		16.3487	16.3159	16.3323		21.1974	20.773	20.9852	4.65293	0.376484	0.770312		Total	12	0.9168	0.25542	0.07373	0.7545	1.0791	0.51	1.54
2% Glucose+F9-1		16.9259	16.5321	16.729		22.6586	22.3105	22.4846	5.75561	-0.138018	1.10039
2% Glucose+F9-2		16.5713	16.6303	16.6008		21.4433	21.2841	21.3637	4.76287	-0.61855	1.53533
2% Glucose+F9-3		15.5853	15.4925	15.5389		19.8785	20.132	20.0053	4.46636	0.18992	0.876654
		Ct1	Ct2	Avg. CT		Ct1	Ct2	Avg. CT	ΔCt	ΔΔCt	2^-ΔΔCt
control-1	act-1	16.2881	16.341	16.3145	mtl-1	21.7945	21.7337	21.7641	5.44955	0	1		Descriptives
control-2		14.7496	14.6639	14.7068		20.8552	21.0406	20.9479	6.24114	0	1		pcr
control-3		15.2876	15.0596	15.1736		21.3234	21.2835	21.3034	6.12983	0	1			N	Mean	Std. Deviation	Std. Error	95% Confidence Interval for Mean		Minimum	Maximum
2% Glucose-1		16.0578	15.9304	15.9941		23.0078	22.3403	22.674	6.67993	1.23037	0.426207							Lower Bound	Upper Bound
2% Glucose-2		16.6334	14.2951	15.4642		21.7554	21.8035	21.7795	6.31525	0.07411	0.949928	b	1	3	1	0	0	1	1	1	1
2% Glucose-3		15.1276	14.8205	14.974		21.0994	21.404	21.2517	6.27766	0.147826	0.90261	b	2	3	0.7597	0.28992	0.16738	0.0395	1.4799	0.43	0.95
2% Glucose+NF-1		16.0136	15.7931	15.9033		20.7279	20.835	20.7814	4.87813	-0.571426	1.48599	a	3	3	1.624	0.38027	0.21955	0.6794	2.5686	1.33	2.05
2% Glucose+NF-2		15.8574	15.7732	15.8153		21.1035	20.932	21.0178	5.20249	-1.03866	2.05431	a	4	3	1.7213	0.38973	0.22501	0.7532	2.6895	1.42	2.16
2% Glucose+NF-3		16.0046	15.7395	15.8721		21.7805	21.395	21.5878	5.71574	-0.414097	1.33246		Total	12	1.2762	0.49979	0.14428	0.9587	1.5938	0.43	2.16
2% Glucose+F9-1		15.9571	15.8504	15.9037		20.3545	20.1306	20.2426	4.33882	-1.11073	2.15955
2% Glucose+F9-2		15.7248	15.533	15.6289		21.4019	21.3369	21.3694	5.74058	-0.500557	1.41476
2% Glucose+F9-3		15.8995	16.0148	15.9572		21.3317	21.5058	21.4188	5.4616	-0.668231	1.58912
		Ct1	Ct2	Avg. CT		Ct1	Ct2	Avg. CT	ΔCt	ΔΔCt	2^-ΔΔCt
control-1	act-1	16.4263	16.5094	16.4678	sod-3	26.568	26.3949	26.4814	10.0136	0	1		Descriptives
control-2		16.8485	16.9044	16.8764		26.9264	26.694	26.8102	9.93379	0	1		pcr
control-3		16.98	16.5493	16.7647		25.7415	25.7274	25.7345	8.96981	0	1			N	Mean	Std. Deviation	Std. Error	95% Confidence Interval for Mean		Minimum	Maximum
2% Glucose-1		16.4591	16.394	16.4265		27.1599	26.5493	26.8546	10.428	0.414452	0.750304							Lower Bound	Upper Bound
2% Glucose-2		16.5663	16.385	16.4757		26.6803	26.8304	26.7553	10.2797	0.345872	0.786832	c	1	3	1	0	0	1	1	1	1
2% Glucose-3		16.3112	16.404	16.3576		25.7762	26.1004	25.9383	9.58072	0.610909	0.654784	d	2	3	0.7307	0.06809	0.03931	0.5615	0.8998	0.66	0.79
2% Glucose+NF-1		15.8101	15.934	15.8721		25.5954	25.4873	25.5413	9.66928	-0.344318	1.26955	b	3	3	1.2393	0.0305	0.01761	1.1636	1.3151	1.21	1.27
2% Glucose+NF-2		16.3341	16.7395	16.5368		26.2452	26.1494	26.1973	9.66051	-0.273278	1.20855	a	4	3	1.8917	0.0405	0.02338	1.7911	1.9923	1.85	1.93
2% Glucose+NF-3		16.3202	16.1951	16.2576		24.946	24.8904	24.9182	8.66057	-0.309236	1.23905		Total	12	1.2154	0.45048	0.13004	0.9292	1.5016	0.66	1.93
2% Glucose+F9-1		16.8397	16.668	16.7539		26.0447	25.7138	25.8793	9.1254	-0.888201	1.85087
2% Glucose+F9-2		16.6375	16.8504	16.7439		25.779	25.6758	25.7274	8.98349	-0.950299	1.93227
2% Glucose+F9-3		16.4146	16.7593	16.5869		24.6823	24.592	24.6372	8.05022	-0.919584	1.89157
		Ct1	Ct2	Avg. CT		Ct1	Ct2	Avg. CT	ΔCt	ΔΔCt	2^-ΔΔCt
control-1	act-1	16.6768	16.854	16.7654	skn-1	22.5946	20.8924	21.7435	4.97813	0	1		Descriptives
control-2		16.6984	16.4953	16.5969		20.9407	21.0384	20.9896	4.3927	0	1		pcr
control-3		18.4607	14.5112	16.486		20.9204	21.2035	21.062	4.57599	0	1			N	Mean	Std. Deviation	Std. Error	95% Confidence Interval for Mean		Minimum	Maximum
2% Glucose-1		16.4783	16.3954	16.4368		22.0611	22.4105	22.2358	5.79895	0.820823	0.566119							Lower Bound	Upper Bound
2% Glucose-2		16.4721	16.2473	16.3597		21.862	21.7943	21.8281	5.46845	1.07575	0.474423	a	1	3	1	0	0	1	1	1	1
2% Glucose-3		16.1354	16.1839	16.1597		21.639	21.7328	21.6859	5.52622	0.950233	0.517549	c	2	3	0.5193	0.04601	0.02657	0.405	0.6336	0.47	0.57
2% Glucose+NF-1		16.949	16.9025	16.9258		22.1191	22.0984	22.1088	5.18301	0.204882	0.86761	b	3	3	0.797	0.16443	0.09493	0.3885	1.2055	0.61	0.91
2% Glucose+NF-2		16.7401	16.6871	16.7136		21.2871	21.1854	21.2362	4.52261	0.129918	0.913883	a	4	3	1.1137	0.12779	0.07378	0.7962	1.4311	1	1.25
2% Glucose+NF-3		16.4586	16.6204	16.5395		21.7221	21.9402	21.8312	5.29166	0.715672	0.608921		Total	12	0.8575	0.25277	0.07297	0.6969	1.0181	0.47	1.25
2% Glucose+F9-1		16.4476	16.6104	16.529		21.4894	21.294	21.3917	4.86272	-0.11541	1.08328
2% Glucose+F9-2		16.5647	16.483	16.5238		20.9905	20.8321	20.9113	4.38741	-0.005282	1.00367
2% Glucose+F9-3		16.6489	16.5981	16.6235		20.8029	20.943	20.873	4.24947	-0.326521	1.25399
		Ct1	Ct2	Avg. CT		Ct1	Ct2	Avg. CT	ΔCt	ΔΔCt	2^-ΔΔCt
control-1	act-1	16.5327	16.6241	16.5784	gst-4	22.464	22.6104	22.5372	5.95879	0	1		Descriptives
control-2		16.1512	16.3185	16.2349		21.6859	21.5493	21.6176	5.38277	0	1		pcr
control-3		16.4626	16.3942	16.4284		21.8201	21.798	21.8091	5.38069	0	1			N	Mean	Std. Deviation	Std. Error	95% Confidence Interval for Mean		Minimum	Maximum
2% Glucose-1		16.0902	16.2185	16.1544		22.0681	22.3759	22.222	6.06764	0.10885	0.927327							Lower Bound	Upper Bound
2% Glucose-2		16.0104	15.9974	16.0039		22.0806	21.8305	21.9556	5.95163	0.568858	0.67415	c	1	3	1	0	0	1	1	1	1
2% Glucose-3		16.2889	16.2104	16.2497		21.7905	21.9135	21.852	5.60238	0.22169	0.85756	c	2	3	0.8197	0.13078	0.07551	0.4948	1.1446	0.67	0.93
2% Glucose+NF-1		16.1191	16.3506	16.2349		20.4731	20.7104	20.5917	4.35688	-1.60191	3.03545	b	3	3	3.2367	0.2015	0.11634	2.7361	3.7372	3.04	3.44
2% Glucose+NF-2		16.4515	16.3954	16.4235		19.9086	20.1406	20.0246	3.60115	-1.78163	3.43814	a	4	3	4.1243	0.3205	0.18504	3.3282	4.9205	3.8	4.45
2% Glucose+NF-3		16.4009	16.293	16.347		20.2087	19.8575	20.0331	3.68612	-1.69457	3.2368		Total	12	2.2952	1.49488	0.43153	1.3454	3.245	0.67	4.45
2% Glucose+F9-1		16.4168	16.3802	16.3985		20.475	20.385	20.43	4.03146	-1.92733	3.80351
2% Glucose+F9-2		16.7571	16.9142	16.8356		19.9889	20.1439	20.0664	3.23074	-2.15203	4.44453
2% Glucose+F9-3		16.8141	16.6932	16.7536		19.9965	20.1841	20.0903	3.33663	-2.04405	4.12402
		Ct1	Ct2	Avg. CT		Ct1	Ct2	Avg. CT	ΔCt	ΔΔCt	2^-ΔΔCt
control-1	act-1	17.2645	17.1903	17.2274	gcs-1	25.0913	24.945	25.0182	7.79074	0	1		Descriptives
control-2		17.0198	16.739	16.8794		24.6921	24.5149	24.6035	7.7241	0	1		pcr
control-3		16.6926	16.5831	16.6378		24.2629	23.9605	24.1117	7.47387	0	1			N	Mean	Std. Deviation	Std. Error	95% Confidence Interval for Mean		Minimum	Maximum
2% Glucose-1		16.3432	16.5106	16.4269		25.0529	24.8704	24.9617	8.53479	0.744047	0.597062							Lower Bound	Upper Bound
2% Glucose-2		16.0878	16.2196	16.1537		24.8714	24.684	24.7777	8.62402	0.89992	0.535916	a	1	3	1	0	0	1	1	1	1
2% Glucose-3		16.3435	16.5294	16.4365		24.9588	24.8649	24.9119	8.47541	1.00154	0.499467	b	2	3	0.544	0.04949	0.02857	0.4211	0.6669	0.5	0.6
2% Glucose+NF-1		16.4822	16.3929	16.4375		24.5669	24.7104	24.6386	8.20108	0.410344	0.752444	a	3	3	0.962	0.21	0.12124	0.4403	1.4837	0.75	1.17
2% Glucose+NF-2		16.7778	16.695	16.7364		24.1107	24.3518	24.2312	7.4948	-0.229304	1.17227	a	4	3	0.9817	0.17354	0.1002	0.5506	1.4128	0.82	1.17
2% Glucose+NF-3		17.0226	16.8305	16.9266		24.3922	24.5194	24.4558	7.52923	0.055356	0.962357		Total	12	0.8719	0.23073	0.06661	0.7253	1.0185	0.5	1.17
2% Glucose+F9-1		16.7623	16.525	16.6437		24.1045	24.3195	24.212	7.56833	-0.222406	1.16668
2% Glucose+F9-2		16.9948	16.736	16.8654		24.7204	24.5921	24.6562	7.79079	0.066688	0.954827
2% Glucose+F9-3		16.7044	16.8042	16.7543		24.5209	24.4991	24.51	7.75568	0.281807	0.82256

## Sheet: Table 2
	2, 4, 6-trihydroxybenzaldehyde
	8 mM	7.5	7	6	5	4
sample1	0.5079	0.5728	0.6746	0.9272	1.2651	1.4904	control1	1.4527
sample2	0.5174	0.6226	0.5789	0.9194	1.1582	1.5415	control2	1.4458
sample3	0.5391	0.6208	0.6733	0.91	1.4143	1.6142	control3	1.4391
sample4	0.5726	0.6681	0.6685	1.0243	1.2916	1.5797	control4	1.4468
background1	0.409	0.4095	0.4002	0.3325	0.2849	0.2296	blank1	0.0454
background2	0.4364	0.4135	0.355	0.3069	0.301	0.1982	blank2	0.0463
background3	0.4518	0.409	0.404	0.3501	0.2876	0.1744	blank3	0.0401
Avg. sample	0.53425	0.621075	0.648825	0.945225	1.2823	1.55645	Avg. control	1.4461
Avg. background	0.4324	0.410667	0.3864	0.329833	0.291167	0.200733	Avg. blank	0.0439333
Avg. sample-Avg. background	0.10185	0.210408	0.262425	0.615392	0.991133	1.35572	Avg. control-Avg. blank	1.40217
Inhibition	92.7364	84.9944	81.2848	56.1124	29.3158	3.31503
	taxifolin
	10mM	8	6	5	4	3	2	1
sample1	1.1566	1.1969	1.2829	1.3775	1.4068	1.5277	1.6575	1.6921	control1	1.5161
sample2	1.1003	1.1742	1.2916	1.3238	1.4004	1.503	1.5964	1.6937	control2	1.508
sample3	1.0927	1.1436	1.2043	1.2348	1.3549	1.5265	1.5656	1.6517	control3	1.5704
sample4	1.0598	1.0789	1.1819	1.2372	1.3964	1.3901	1.6136	1.7067	control4	1.5244
background1	0.72	0.7049	0.6183	0.5582	0.5303	0.4541	0.3643	0.2547	blank1	0.0428
background2	0.7023	0.6723	0.6208	0.5663	0.5139	0.4801	0.3554	0.2406	blank2	0.0389
background3	0.6995	0.6748	0.6103	0.5536	0.5076	0.4429	0.3567	0.2486	blank3	0.042
Avg. sample	1.10235	1.1484	1.24018	1.29332	1.38962	1.48683	1.60827	1.68605	Avg. control	1.52973
Avg. background	0.707267	0.684	0.616467	0.559367	0.517267	0.459033	0.3588	0.247967	Avg. blank	0.0412333
Avg. sample-Avg. background	0.395083	0.4644	0.623708	0.733958	0.872358	1.02779	1.24947	1.43808	Avg. control-Avg. blank	1.48849
Inhibition	80.1758	75.519	64.8164	57.4096	48.1116	37.6694	22.7763	10.1053
	cyanidin chloride
	250𝜇M	200	100	50	25	12.5
sample1	0.1754	0.1479	0.1476	1.1079	1.288	1.2883	control1	1.3205
sample2	0.1664	0.1411	0.1521	1.1014	1.2777	1.2983	control2	1.276
sample3	0.1617	0.1436	0.1908	1.1315	1.3171	1.2855	control3	1.3411
sample4	0.1683	0.1488	0.1406	1.1489	1.2385	1.2813	control4	1.2929
background1	0.1731	0.1488	0.1022	0.0703	0.0575	0.0525	blank1	0.046
background2	0.1695	0.1497	0.0975	0.0718	0.0551	0.0506	blank2	0.0405
background3	0.1669	0.1455	0.0953	0.0707	0.0579	0.0521	blank3	0.0468
background4	0.1742	0.1465	0.0943	0.0754	0.0626	0.0492	blank4	0.0445
Avg. sample	0.16795	0.14535	0.157775	1.12243	1.28032	1.28835	Avg. control	1.30762
Avg. background	0.170925	0.147625	0.097325	0.07205	0.058275	0.0511	Avg. blank	0.04445
Avg. sample-Avg. background	-0.002975	-0.002275	0.06045	1.05038	1.22205	1.23725	Avg. control-Avg. blank	1.26317
Inhibition	100.236	100.18	95.2138	16.8349	3.24228	2.0388
	acarbose
	20mM	10	8	5	4	2	1	0.5
sample1	0.3544	0.5305	0.6038	0.8494	0.772	1.1815	1.3891	1.4211	control1	1.4817
sample2	0.3367	0.4983	0.5881	0.7844	0.8144	1.1625	1.4162	1.4752	control2	1.4727
sample3	0.3421	0.4858	0.5865	0.7723	0.8845	1.1891	1.3759	1.4944	control3	1.4664
sample4	0.3307	0.4973	0.5614	0.7851	0.8608	1.1808	1.367	1.4602	control4	1.4703
background1	0.0424	0.041	0.0526	0.0447	0.0465	0.0464	0.0441	0.0445	blank1	0.0422
background2	0.0486	0.047	0.0487	0.0444	0.0425	0.0434	0.0441	0.0452	blank2	0.0461
background3	0.0473	0.0448	0.0467	0.0428	0.0397	0.0428	0.0439	0.0483	blank3	0.0453
Avg. sample	0.340975	0.502975	0.58495	0.7978	0.832925	1.17848	1.38705	1.46272	Avg. control	1.47277
Avg. background	0.0461	0.0442667	0.0493333	0.0439667	0.0429	0.0442	0.0440333	0.046	Avg. blank	0.0445333
Avg. sample-Avg. background	0.294875	0.458708	0.535617	0.753833	0.790025	1.13428	1.34302	1.41672	Avg. control-Avg. blank	1.42824
Inhibition	79.3534	67.8821	62.4971	47.2179	44.6839	20.5801	5.96438	0.803459

## Sheet: Fig.S1
A
	Control	1% Glucose	2% Glucose	4% Glucose		Standard	blank
	0.118	0.116	0.168	0.112		0.242	0.041
	0.118	0.117	0.157	0.13		0.249	0.054
	0.116	0.12	0.1625	0.129		0.253	0.049
					Avg.	0.248	0.048
	0.12145	0.11798	0.2082	0.11104
	0.12145	0.119715	0.189115	0.14227	Standard-blank	0.2
	0.11798	0.12492	0.198657	0.140535
protenin 𝜇g/mL	631.414	694.147	522.969	367.839
GLU(mmol/g protenin)	0.192346	0.169964	0.398112	0.301871
	0.192346	0.172464	0.361618	0.386772
	0.186851	0.179962	0.379865	0.382055
		Descriptives
		GLU
			N	Mean	Std. Deviation	Std. Error	95% Confidence Interval for Mean		Minimum	Maximum
							Lower Bound	Upper Bound
	b	1	3	0.190514	0.0031729	0.0018319	0.182632	0.198396	0.1869	0.1923
	b	2	3	0.17413	0.0052031	0.003004	0.161205	0.187055	0.17	0.18
	a	3	3	0.379865	0.0182468	0.0105348	0.334537	0.425192	0.3616	0.3981
	a	4	3	0.3569	0.0477144	0.0275479	0.23837	0.475429	0.3019	0.3868
		Total	12	0.275352	0.100155	0.0289124	0.211716	0.338988	0.17	0.3981
B	Control							1% Glucose							2% Glucose							4% Glucose
	1	2	3	4	5	6		1	2	3	4	5	6		1	2	3	4	5	6		1	2	3	4	5	6
0	7217	7103	7092	7044	7045	7055	7092.67	6806	6896	6926	6857	6917	6971		6630	6644	6710	6602	6571	6491		6470	6335	6454	6409	6448	6441
20	7301	7249	7257	7115	7089	7244		7144	6999	7126	6864	7195	6976		6869	6826	6836	6841	6729	6803		6589	6474	6497	6552	6637	6525
40	8077	7876	8022	7707	7811	7853		8034	7708	7954	7544	7983	7796		7931	7682	7550	7615	7488	7776		7689	7376	7276	7219	7492	7375
60	9108	8856	9062	8585	8744	8797		9004	8568	9107	8317	9263	8838		9361	8773	8637	8617	8458	9331		9181	8472	8357	8220	8704	8468
80	10387	9944	10267	9485	9693	9954		10371	9762	10610	9378	10545	10092		11316	10288	10150	9814	9920	11447		11218	10164	9822	9621	10245	9879
100	11871	11402	11940	10761	11051	11212		12184	11202	12590	10676	12360	11799		13712	12350	11914	11398	11845	14023		13749	12365	11783	11391	12099	11899
120	13690	13228	13813	12034	12601	12843		14219	13071	15053	12269	14444	13686		16633	14826	13822	13163	14111	16977		16680	14792	13929	13613	14193	13942
140	15630	15095	16052	13640	14420	14699		16491	15086	18055	14226	16699	16079		19666	17786	16164	15328	16683	20145		20220	17649	16956	15924	16747	16573
160	17697	17445	18221	15448	16395	16664		19249	17441	21194	16196	19217	18461		23024	20829	18587	17548	19590	23288		23799	20816	20090	18646	19625	19524
180	19875	19782	20715	17380	18615	18798		22281	19875	24880	18629	22148	21147		26976	23917	21183	20066	22801	26489		27544	24126	23697	21498	22571	22623
0	101.753	100.146	99.9906	99.3138	99.3279	99.4689	100	95.9583	97.2272	97.6502	96.6773	97.5233	98.2846		93.4768	93.6742	94.6048	93.0821	92.645	91.5171		91.221	89.3176	90.9954	90.3609	90.9108	90.8121
20	102.937	102.204	102.317	100.315	99.9483	102.134		100.724	98.6794	100.47	96.776	101.443	98.3551		96.8465	96.2402	96.3812	96.4517	94.8726	95.916		92.8988	91.2774	91.6016	92.3771	93.5755	91.9964
40	113.878	111.044	113.103	108.662	110.128	110.72		113.272	108.676	112.144	106.363	112.553	109.916		111.82	108.309	106.448	107.364	105.574	109.634		108.408	103.995	102.585	101.781	105.63	103.981
60	128.414	124.861	127.766	121.041	123.282	124.03		126.948	120.801	128.4	117.262	130.6	124.608		131.981	123.691	121.774	121.492	119.25	131.558		129.444	119.447	117.826	115.894	122.718	119.391
80	146.447	140.201	144.755	133.73	136.662	140.342		146.221	137.635	149.591	132.221	148.675	142.288		159.545	145.051	143.106	138.368	139.863	161.392		158.163	143.303	138.481	135.647	144.445	139.285
100	167.37	160.758	168.343	151.72	155.809	158.079		171.783	157.938	177.507	150.522	174.264	166.355		193.326	174.123	167.976	160.701	167.003	197.711		193.848	174.335	166.129	160.602	170.585	167.765
120	193.016	186.502	194.75	169.668	177.662	181.074		200.475	184.289	212.233	172.981	203.647	192.96		234.51	209.033	194.877	185.586	198.952	239.36		235.172	208.553	196.386	191.931	200.108	196.569
140	220.368	212.825	226.318	192.311	203.309	207.242		232.508	212.699	254.559	200.573	235.44	226.699		277.272	250.766	227.897	216.111	235.215	284.026		285.083	248.834	239.064	224.514	236.117	233.664
160	249.511	245.958	256.899	217.802	231.154	234.947		271.393	245.902	298.816	228.349	270.942	260.283		324.617	293.67	262.059	247.41	276.201	328.339		335.544	293.486	283.25	262.891	276.694	275.27
180	280.219	278.908	292.062	245.042	262.454	265.034		314.141	280.219	350.785	262.652	312.266	298.153		380.336	337.207	298.661	282.912	321.473	373.47		388.345	340.154	334.106	303.102	318.23	318.963
C
	Control	2% Glucose	2% Glucose+0.85 mg/mL	2% Glucose+1.25 mg/mL	2% Glucose+2.5 mg/mL		Standard	blank
	0.057	0.084	0.075	0.065	0.073		0.152	0.048
	0.056	0.082	0.075	0.066	0.072		0.158	0.051
	0.055	0.079	0.077	0.066	0.071		0.161	0.042
						Avg.	0.157	0.047
	0.0630909	0.233436	0.176655	0.113564	0.164036
	0.0567818	0.220818	0.176655	0.119873	0.157727	Standard-blank	0.11
	0.0504727	0.201891	0.189273	0.119873	0.151418
protenin 𝜇g/mL	221.457	433.072	347.735	258.946	328.497
GLU(mmol/g protenin)	0.28489	0.539025	0.508015	0.438562	0.499353
	0.256401	0.509888	0.508015	0.462926	0.480148
	0.227912	0.466183	0.544301	0.462926	0.460942
		Descriptives
		GLU
			N	Mean	Std. Deviation	Std. Error	95% Confidence Interval for Mean		Minimum	Maximum
							Lower Bound	Upper Bound
	c	1	3	0.256401	0.028489	0.0164482	0.185631	0.327172	0.2279	0.2849
	a	2	3	0.505032	0.0366626	0.0211672	0.413957	0.596107	0.4662	0.539
	a	3	3	0.52011	0.0209502	0.0120956	0.468067	0.572153	0.508	0.5443
	b	4	3	0.454805	0.0140669	0.0081215	0.419861	0.489749	0.4386	0.4629
	ab	5	3	0.480148	0.0192059	0.0110885	0.432437	0.527858	0.4609	0.4994
		Total	15	0.443299	0.101671	0.0262514	0.386996	0.499603	0.2279	0.5443
D	Control							2% Glucose							2% Glucose+0.85 mg/mL							2% Glucose+1.25 mg/mL							2% Glucose+2.5 mg/mL
	1	2	3	4	5	6		1	2	3	4	5	6		1	2	3	4	5	6		1	2	3	4	5	6		1	2	3	4	5	6
0	7675	7724	7754	7892	7838	7849	7788.67	7597	7518	7626	7566	7715	7647		7083	7146	6946	7095	7340	7142		7171	7120	7019	7127	7189	7223		7261	7392	7317	7312	7542	7492
20	7670	7706	7829	7919	7850	8126		7459	7528	7492	7438	7770	7603		6920	6881	6726	6702	7167	6838		6887	6827	6596	7005	6900	6956		6990	7117	6974	7099	7322	7246
40	8288	8407	8355	8511	8346	8580		8144	8039	8298	8078	8830	8401		7743	7433	7260	7374	7858	7431		7393	7219	6931	7639	7532	7584		7676	7869	7545	7713	7824	7739
60	9108	9112	9258	9462	8967	9296		9010	8974	9049	9063	10193	9543		8675	8550	8024	8269	8864	8275		8063	7864	7297	8293	8148	8517		8247	8756	8172	8318	8676	8246
80	10096	10164	10220	10486	9772	10164		10193	10081	10456	10142	12054	10887		9802	9765	9048	9174	10076	9214		8888	8410	7744	9221	9029	9505		9220	9580	8906	8973	9699	9021
100	11348	11322	11408	11831	10657	11281		11624	11426	11855	11546	14266	12554		11292	11192	10127	10453	11664	10425		9701	9212	8227	10345	9844	10759		10317	11223	9818	10042	10809	9883
120	12938	12841	12772	13291	11865	12506		13286	13258	13590	13039	16942	14682		13345	12983	11953	11985	13519	11930		10961	10093	8943	11555	11048	12124		11486	12654	10959	11258	12123	10745
140	14907	14796	14340	15049	13001	13948		15474	15212	15816	14845	20219	17237		15463	14977	13729	13887	15614	13596		12457	11150	9514	13070	12505	14002		13249	14553	12110	12382	13552	11960
160	17240	16725	16253	17022	14512	15912		17949	17452	18013	16672	24185	20181		17692	17000	15894	15662	17789	15342		14251	12276	10409	14663	13810	15569		15020	16578	13535	13716	15276	13154
180	19340	18889	18326	19222	16210	17901		20717	20021	20466	18690	28209	23326		20273	19282	18207	17831	20451	17431		16200	13835	11274	16467	15451	17799		17031	18896	15244	15373	17008	14805
0	98.5406	99.1697	99.5549	101.327	100.633	100.775	100	97.5392	96.5249	97.9115	97.1411	99.0542	98.1811		90.9398	91.7487	89.1809	91.0939	94.2395	91.6973		92.0697	91.4149	90.1181	91.5047	92.3008	92.7373		93.2252	94.9071	93.9442	93.88	96.833	96.191
20	98.4764	98.9386	100.518	101.673	100.787	104.331		95.7674	96.6533	96.191	95.4977	99.7603	97.6162		88.847	88.3463	86.3562	86.0481	92.0183	87.7942		88.4233	87.653	84.6871	89.9384	88.5903	89.3092		89.7458	91.3764	89.5404	91.1452	94.0084	93.0326
40	106.411	107.939	107.271	109.274	107.156	110.16		104.562	103.214	106.539	103.715	113.37	107.862		99.4137	95.4335	93.2124	94.676	100.89	95.4079		94.92	92.6859	88.9883	98.0784	96.7046	97.3722		98.5534	101.031	96.8715	99.0285	100.454	99.3623
60	116.939	116.99	118.865	121.484	115.129	119.353		115.681	115.219	116.182	116.361	130.87	122.524		111.38	109.775	103.021	106.167	113.806	106.244		103.522	100.967	93.6874	106.475	104.614	109.351		105.885	112.42	104.922	106.796	111.393	105.872
80	129.624	130.497	131.216	134.632	125.464	130.497		130.87	129.432	134.246	130.215	154.763	139.78		125.85	125.374	116.169	117.787	129.367	118.3		114.115	107.977	99.4265	118.39	115.925	122.036		118.377	122.999	114.346	115.206	124.527	115.822
100	145.699	145.365	146.469	151.9	136.827	144.839		149.242	146.7	152.208	148.241	183.164	161.183		144.98	143.696	130.022	134.208	149.756	133.848		124.553	118.274	105.628	132.821	126.389	138.137		132.462	144.094	126.055	128.931	138.779	126.889
120	166.113	164.868	163.982	170.645	152.337	160.567		170.581	170.222	174.484	167.41	217.521	188.505		171.339	166.691	153.467	153.877	173.573	153.171		140.73	129.586	114.821	148.357	141.847	155.662		147.471	162.467	140.704	144.543	155.649	137.957
140	191.393	189.968	184.114	193.217	166.922	179.081		198.673	195.309	203.064	190.597	259.595	221.309		198.532	192.292	176.269	178.298	200.471	174.561		159.938	143.157	122.152	167.808	160.554	179.774		170.106	186.848	155.482	158.975	173.996	153.556
160	221.347	214.735	208.675	218.548	186.322	204.297		230.45	224.069	231.272	214.055	310.515	259.107		227.151	218.266	204.066	201.087	228.396	196.979		182.971	157.614	133.643	188.261	177.309	199.893		192.844	212.848	173.778	176.102	196.131	168.886
180	248.309	242.519	235.291	246.794	208.123	229.834		265.989	257.053	262.766	239.964	362.18	299.486		260.288	247.565	233.763	228.935	262.574	223.8		207.995	177.63	144.749	211.423	198.378	228.524		218.664	242.609	195.72	197.377	218.369	190.084

## Sheet: Table S1
	standard curve
	absorbance	0.045	0.173	0.266	0.452	0.553	0.691	1.336	1.965	2.32
		0.047	0.174	0.27	0.453	0.563	0.703	1.353	1.968	2.343
		0.046	0.171	0.268	0.456	0.554	0.699	1.343	1.966	2.345
	Avg	0.046	0.172667	0.268	0.453667	0.556667	0.697667	1.344	1.96633	2.336
	mg gallic acid/mL	0	0.004	0.008	0.012	0.016	0.02	0.04	0.06	0.08
	Samples	10.0 mg samples dissolved in 1 mL distilled water and dilluted 500 times before expriments.
		NF	F0	F1	F2	F3	F5	F7	F9
	absorbance	0.36	0.339	0.37	0.363	0.35	0.349	0.355	0.371
		0.354	0.327	0.342	0.348	0.334	0.365	0.336	0.365
		0.356	0.343	0.359	0.344	0.335	0.352	0.338	0.35
	mg gallic acid/mL	0.009524	0.0088226	0.009858	0.0096242	0.00919	0.0091566	0.009357	0.0098914
		0.0093236	0.0084218	0.0089228	0.0091232	0.0086556	0.009691	0.0087224	0.009691
		0.0093904	0.0089562	0.0094906	0.0089896	0.008689	0.0092568	0.0087892	0.00919
	mg gallic acid/mL（Before dilution）	4.762	4.4113	4.929	4.8121	4.595	4.5783	4.6785	4.9457
		4.6618	4.2109	4.4614	4.5616	4.3278	4.8455	4.3612	4.8455
		4.6952	4.4781	4.7453	4.4948	4.3445	4.6284	4.3946	4.595
	Purity(%)	47.62	44.113	49.29	48.121	45.95	45.783	46.785	49.457
		46.618	42.109	44.614	45.616	43.278	48.455	43.612	48.455
		46.952	44.781	47.453	44.948	43.445	46.284	43.946	45.95
		Descriptives
		purity
			N	Mean	Std. Deviation	Std. Error	95% Confidence Interval for Mean		Minimum	Maximum
							Lower Bound	Upper Bound
	ab	1	3	47.0633	0.51019	0.29456	45.7959	48.3307	46.62	47.62
	c	2	3	43.6677	1.39055	0.80284	40.2133	47.122	42.11	44.78
	ab	3	3	46.7293	1.86213	1.0751	42.1035	51.3551	44.61	48.12
	abc	4	3	46.2283	1.67278	0.96578	42.0729	50.3838	44.95	48.12
	bc	5	3	44.2243	1.4968	0.86418	40.5061	47.9426	43.28	45.95
	ab	6	3	46.8407	1.42032	0.82002	43.3124	50.3689	45.78	48.46
	bc	7	3	44.781	1.74353	1.00663	40.4498	49.1122	43.61	46.79
	a	8	3	47.954	1.80638	1.04291	43.4667	52.4413	45.95	49.46
		Total	24	45.9361	1.94375	0.39677	45.1153	46.7569	42.11	49.46
